18 **ABSTRACT**

19 Chemical-induced spores of the Gram-negative bacterium *Myxococcus xanthus* are  
20 peptidoglycan (PG)-deficient. It is unclear how these spherical spores germinate into  
21 rod-shaped, walled cells without preexisting PG templates. We found that germinating  
22 spores first synthesize PG randomly on spherical surfaces. MglB, a GTPase activating  
23 protein, surveys the status of PG growth and establishes one future cell pole. Following  
24 MglB, the Ras family GTPase MglA localizes to the second pole. MglA directs molecular  
25 motors to transport the bacterial actin homolog MreB and the Rod PG synthesis  
26 complexes away from poles. The Rod system establishes rod-shape by elongating PG  
27 at nonpolar regions. Thus, the interaction between GTPase, cytoskeletons and  
28 molecular motors provides a mechanism for the *de novo* establishment of rod-shape in  
29 bacteria.

## 30 **Significance**

31 Spheres and rods are among the most common shapes adopted by walled bacteria, in which  
32 the peptidoglycan (PG) cell wall largely determines cell shape. When induced by chemicals,  
33 rod-shaped vegetative cells of the Gram-negative bacterium *Myxococcus xanthus* thoroughly  
34 degrades their PG and shrinks into spherical spores. As these spores germinate, cells rebuild  
35 rod-shaped PG without preexisting templates, which provides a rare opportunity to visualize *de*  
36 *novo* PG synthesis and bacterial morphogenesis. In this study, we investigated how spherical  
37 spores elongation into rods during germination and elucidated a system for rod-shape  
38 morphogenesis that includes the Rod PG synthesis system, a GTPase-GAP pair, the MreB  
39 cytoskeleton and a molecular motor.

40 Morphogenesis is a fundamental problem in biological systems. Compared to symmetric  
41 spheres, rods are asymmetric and polarized. For most rod-shaped bacteria, the  
42 peptidoglycan (PG) cell wall defines cell geometry, which is synthesized by two major  
43 enzymatic systems. The Rod system consists of RodA, a SEDS-family PG polymerase,  
44 PBP2, a member of the class B penicillin-binding proteins (bPBPs), and MreB, a  
45 bacterial actin homolog (1-3). MreB orchestrates PG growth by the Rod complexes in  
46 response to local cell curvature (4-9). In contrast, class A PBPs (aPBPs) contribute to  
47 PG growth independent of MreB (10, 11).

48 *Myxococcus xanthus*, a rod-shaped Gram-negative bacterium, utilizes polarized  
49 geometry for directed locomotion. MglA, a Ras family small GTPase, controls the  
50 direction of gliding motility. The motors for gliding assemble into functional machineries  
51 on MreB filaments (12-16). Consequently, the gliding machineries carry MreB filaments  
52 as they move rapidly in the membrane (17). As cells move, GTP-bound MglA forms  
53 large clusters at leading cell poles, whereas GDP-bound MglA distributes  
54 homogeneously in the cytoplasm (16, 18, 19). The activity of MglA is regulated by its  
55 cognate GTPase-activating protein (GAP), MglB, which forms large clusters at lagging  
56 cell poles. MglB activates the GTPase activity of MglA, expelling MglA-GTP from  
57 lagging poles (18, 19). MglA regulates the assembly and moving direction of the gliding  
58 machinery through direct interaction with MreB (16, 20). Overall, the polarized  
59 localization and activities of MglA and MglB ensure that the majority of gliding  
60 machineries moves from poles to nonpolar regions, which generates propulsion (12, 16,  
61 20).



62           Some rod-shaped bacteria change their geometry through sporulation. In  
63 Firmicutes such as Bacilli and Clostridia, the morphological differentiation from rod-  
64 shaped vegetative cells to oval spores begins with an asymmetric division, resulting in  
65 the formation of a smaller spore wholly contained within a larger mother cell. In contrast  
66 to endospore-forming bacteria, *M. xanthus* produces spores using two division-  
67 independent mechanisms. First, groups of vegetative cells can aggregate on solid  
68 surfaces and build spore-filled fruiting bodies (21). Second, individual *M. xanthus* cells  
69 can form dispersed, spherical spores in response to chemical signals, such as glycerol  
70 (22). Unlike endospores that contain intact and often thickened PG (23, 24), PG is  
71 thoroughly degraded during single cell sporulation (25). Without the polarity defined by  
72 PG, the mechanism by which glycerol-induced *M. xanthus* spores elongate into rods  
73 remains largely unknown.

## 74 **Results**

### 75 **Two-phase morphological transition during *M. xanthus* spore germination.**

76 Overnight induction by 1 M glycerol produced spores with length to width aspect ratios  
77 (L/W) of  $1.56 \pm 0.36$  ( $n = 789$ ), among which 40.9% are approximately spherical ( $L/W \leq$   
78 1.3). Overall, the L/W values of most (85.4%) spores were lower than 2. As spores  
79 germinated, the morphological transition progressed in a two-phase manner. In the first  
80 hour of germination (Phase I), L/W did not change significantly ( $p = 0.57$ , [Fig. 1A, 1B, SI](#)  
81 [Appendix, Movie S1](#)). After 1 h, L/W increased sharply as the emerging cells  
82 transformed into rods (Phase II). 70.2% ( $n = 198$ ) of emerging cells reached the  
83 dimensions of vegetative cells by 3 h ([Fig. 1A, 1B, SI Appendix, Movie S1, Table S1](#)).  
84 After 8 h, the emerging cells are indistinguishable from vegetative cells ( $L/W = 5.55 \pm$   
85 1.12,  $n = 233$ . [Fig. 1A, 1B](#)). Importantly, many oval spores initiated elongation along  
86 their short axes ([Fig. 1C, SI Appendix, Movie S2](#)), indicating that although not perfectly  
87 spherical, the geometry of mature spores does not predetermine the polarity of  
88 emerging cells.

89 Using cryo-electron tomography (cryo-ET), we confirmed that mature glycerol-  
90 induced spores do not retain PG ([SI Appendix, Fig. S1](#)). To investigate the role of PG  
91 growth in germination, we treated spores with several inhibitors for PG synthesis. In the  
92 presence of mecillinam and A22, which inhibit PBP2 and MreB in the Rod system,  
93 respectively, spores failed to germinate into rods as their L/W ratios did not increase  
94 within 8 h ([Fig. 1A, 1B](#)). These treated spores were viable because they were able to  
95 grow into rods in inhibitor-free medium. Since A22 and mecillinam-treated spores  
96 became even more spherical in Phase I ([Fig. 1D](#)), neither inhibitor blocked the

97 hydrolysis of spore coats that maintain the oval shape of spores. In the presence of  
98 cefsulodin that inhibits PBP1A/B, and cefmetazole that inhibits all PBPs except PBP2,  
99 spores were able to form rods, albeit the elongation rate was slower (Fig. 1A, 1B).  
100 Although not essential for rod-like morphogenesis, aPBPs still contribute to the  
101 establishment and maintenance of rod shape. First, L/W values of the cefmetazole-  
102 treated spores increased significantly in Phase I of germination ( $p < 0.0001$ , Fig. 1B,  
103 1D), suggesting that cells elongate earlier when PBP2 is dominant over other PBPs.  
104 Second, despite successful elongation in early Phase II (1 – 3 h), 57.2% (n = 215)  
105 cefsulodin-treated and 96.6% (n = 203) cefmetazole-treated emerging cells  
106 retrogressed to spheres after 8-h treatments (Fig. 1A, 1B). As glycerol-induced spores  
107 preserve PG precursors(25), when fosfomycin was added to inhibit the production of  
108 UDP-MurNAc, a precursor of PG, spores were able to elongate into rods (Fig. 1A, 1B).  
109 Taken together, PG polymerization by the Rod system is essential for the establishment  
110 of rod-shape.

111 We next visualized the patterns of PG growth using a fluorescent D-amino acid,  
112 TAMRA 3-amino-D-alanine (TADA) (26) to label newly synthesized PG. To enhance  
113 labeling efficiency, we deleted the *dacB* gene (*mxan\_3130*), which encodes a D-Ala-D-  
114 Ala carboxypeptidase (27). The resulted  $\Delta dacB$  cells showed identical morphology to  
115 the wild-type ones and produced sonication-resistant spores. The  $\Delta dacB$  spores  
116 showed minor delay in germination and efficient TADA incorporation (Fig. 1E, SI  
117 Appendix, Fig. S2 and Table S1). Although L/W of spores did not change, PG had  
118 started to grow in Phase I. The surfaces of most Phase I spores (78.0%, n = 600) were  
119 evenly labeled (Fig. 1E). The remaining 22.0% of spores showed bright patches of

120 TADA on their surfaces (Fig. 1F). However, these TADA patches do not likely register  
121 future poles because 47.0% (n = 132) of spores contained more than two such patches  
122 and these patches positioned randomly on spore surfaces (Fig. 1G, 1F). In contrast, as  
123 cells grew into rods, TADA was incorporated heavily at nonpolar regions and  
124 fluorescence signals were generally absent at cell poles (Fig. 1E). The patterns of PG  
125 growth indicate that spores first synthesize PG on their spherical surfaces in Phase I  
126 and then break symmetry in Phase II by growing PG at nonpolar regions.

127 Neither mecillinam, cefsulodin or cefmetazole was able to block TADA  
128 incorporation in Phase I of germination. However, a treatment by all three antibiotics  
129 abolished TADA incorporation (Fig. 1H), indicating that both aPBPs and the Rod system  
130 contribute to the isotropic PG growth in Phase I. In contrast, mecillinam, but not  
131 cefsulodin or cefmetazole, blocked TADA incorporation in Phase II of germination (Fig.  
132 1H). Consistent with a recent report that cells reduce their diameter when the Rod  
133 system becomes dominant over aPBPs (28), emerging cells continued to grow in length  
134 but shrink in width in Phase II (Fig. S3). These results confirm that while both aPBPs  
135 and the Rod system participate PG synthesis in Phase I of germination, the Rod system  
136 plays major roles in cell elongation in Phase II.

137 **MgIA and MgIB are required for rapid cell elongation** To investigate how *M. xanthus*  
138 spores establish cell polarity *de novo*, we tested the potential roles of polar-localized  
139 motility regulators.  $\Delta mgIA$  and  $\Delta mgIB$  cells were able to form sonication-resistant spores  
140 but their spores showed severe delays in elongation during germination. After 3 h, only  
141 15.7% of the  $\Delta mgIA$  (n= 140) and 10.4% of  $\Delta mgIB$  (n = 298) cells reached the  
142 vegetative aspect ratio (Fig. 2A, 2B). In contrast, deleting *romR* and *plpA*, the genes

143 encode another two polar-localized motility regulators (29-31), only caused minor delay  
144 in germination (Fig. S4 and Table S1). Both the  $\Delta mglA$  and  $\Delta mglB$  spores were able to  
145 elongate in length and shrink in width, albeit at significantly lower rates (Fig. 2A, 2B, SI  
146 Appendix, Fig. S3), indicating that PG growth by the Rod complex still occurred.  
147 Strikingly different from wild-type spores that maintained relatively smooth surfaces  
148 during germination, the  $\Delta mglA$  and  $\Delta mglB$  spores generated pronounced bulges at  
149 nonpolar regions in Phase II, appearing to have multiple cell poles (Fig. 2A, 2C, SI  
150 Appendix, Movie S3). However, this crooked morphology was largely corrected after  
151 prolonged growth (8 h) (Fig. 2A), implying that a system independent of MglA and MglB  
152 was able to generate rod shape, although much less robustly. To determine how MglA  
153 and MglB regulate germination, we investigated the spores that expressed the MglA<sup>Q82L</sup>  
154 variant as the sole source of MglA, under the control of the native promoter of the  
155 *mglBA* operon. MglA<sup>Q82L</sup> expresses normally but is unable to hydrolyze GTP (19).  
156 Spores expressing wild-type MglB and MglA<sup>Q82L</sup> showed both a severe delay in cell  
157 elongation and bulged surfaces on emerging cells, similar to the  $\Delta mglA$  and  $\Delta mglB$   
158 spores (Fig. 2A, 2B). Thus, the GTPase activity of MglA is required for rapid cell  
159 elongation and MglB functions through MglA.

160 Both the delayed morphological transition and bulged surfaces of the mutant  
161 spores suggest that MglA and MglB might regulate PG growth during germination.  
162  $\Delta mglA \Delta dacB$  and  $\Delta mglB \Delta dacB$  spores were able to grow PG in an isotropic manner in  
163 Phase I, identical to the  $\Delta dacB$  spores (Fig. 2D). However, emerging cells from both  
164 mutant spores displayed elevated PG growth at cell poles and bulges in Phase II (Fig.  
165 2D). As the Rod complex is the major system for PG growth in Phase II, the MglA-MglB

166 polarity axis might promote rapid cell elongation by restricting the Rod complexes to  
167 nonpolar regions.

168 **MgIB determines the first future pole.** We expressed endogenous YFP-labeled MgIA  
169 and mCherry-labeled MgIB and correlated their localization patterns with L/W. 94.1% (n  
170 = 152) of Phase I spores ( $L/W \leq 2$ ) contained one or two MgIB clusters (Fig. 3A, 3B). In  
171 phase II spores ( $L/W > 2$ ), this ratio increased to 100% (n = 120). In contrast, MgIA did  
172 not form clusters until Phase II, when 54.2% of emerging cells contained one or two  
173 MgIA clusters (Fig. 3A, 3B). Thus, during germination, MgIB establishes polarized  
174 localization before MgIA.

175 To test if the clusters of MgIB in Phase I spores mark the polarity inherited from  
176 previous vegetative cells, we imaged MgIB clusters at 0.05 Hz. the majority of MgIB  
177 clusters in Phase I spores was highly dynamic (Fig. 3C, *SI Appendix, Movie S4*). Among  
178 114 MgIB clusters in Phase I spores, 22.9% remained stationary, and 77.1% showed  
179 typical diffusion, with diffusion coefficients ( $D$ ) of  $1.05 \times 10^{-4} \pm 4.62 \times 10^{-5} \mu\text{m}^2/\text{s}$ . These  
180 “wandering” MgIB clusters were observed in both the approximately spherical ( $L/W <$   
181 1.3) and oval spores ( $1.3 < L/W \leq 2$ ), which supports our hypothesis that, regardless of  
182 their geometry, polarity is not yet established in Phase I spores. As a control, imaged at  
183 the same frequency, the fluorescence patches of TADA remained stationary in all  
184 spores, which excludes potential artifacts caused by the movements of spores (Fig. 3C,  
185 *SI Appendix, Movie S5*).

186 As germination progressed to Phase II ( $L/W > 2$ ), the population of diffusive MgIB  
187 clusters decreased from 77.1% to 23.6% (n = 106, Fig. 3D). Stabilized MgIB clusters  
188 oscillated between newly established poles (Fig. 3C, *SI Appendix, Movie S6*), which

189 might provide a mechanism to ensure that MglB occupies each future cell pole for an  
190 equal amount of time. When we expressed MglA-YFP in the  $\Delta mglB$  background, the  
191 formation of MglA clusters was delayed significantly, and in Phase II of germination,  
192 only 23.3% (n = 120) of emerging cells contained MglA clusters (Fig. 3A, 3B). Thus,  
193 rods start to form when a wandering MglB cluster stabilizes at one future cell pole and  
194 positions MglA to the opposite future pole.

195 To investigate whether pole-like local cell curvature stabilizes MglB clusters, we  
196 quantified the localization of stationary MglB clusters with regard to the geometry of  
197 spores. We divide the spore/cell envelope into four quarters. In the quarter that  
198 contained stationary MglB clusters, we defined the long and short axes as  $0^\circ$  and  $90^\circ$ ,  
199 which mark the local curvature that shows the highest and lowest similarity to the poles  
200 of vegetative cells, respectively. As shown in Fig. 3E, MglB clusters stabilized randomly  
201 in Phase I spores, indicating that MglB stabilizes before the establishment of cell poles  
202 and that local curvature does not dictate the stabilized localization of MglB. The  
203 population of diffusive MglB clusters decreased dramatically in the presence of A22,  
204 mecillinam, cefmetazole and cefsulodin (Fig. 3D), indicating that in Phase I of  
205 germination, active PG growth prevents MglB clusters from settling down. After the  
206 stabilization of MglB, the sites harboring MglB clusters transformed into poles ( $0^\circ$ ) in  
207 Phase II cells (Fig. 3E).

208 MglB clusters could stabilize either at the sites where PG synthesis has completed  
209 or at the sites where PG synthesis has not yet initiated. We ruled out the second  
210 possibility because the majority of MglB clusters (76.4%, n = 106) stabilizes at poles in  
211 Phase II (Fig. 3A, 3B), where PG growth has completed (Fig. 1E). Consistent with our

212 finding that the Rod system becomes the dominant system for PG growth in Phase II  
213 (Fig. 1H), A22 and mecillinam further reduced the small population of diffusive MglB  
214 clusters in Phase II, while cefmetazole and cefsulodin did not show significant effects  
215 (Fig. 3D). Taken together, it is the progress of PG growth, rather than the geometry of  
216 the spore, that defines cell polarity. As MglB clusters only stabilize at the sites where  
217 PG growth is completed, a region where PG synthesis completes first in Phase I will  
218 become a future cell pole.

219 **The MglA-MglB polarity axis regulates PG synthesis by the Rod system through**  
220 **MreB and the gliding motor.** MglA and MglB are both cytoplasmic proteins, which are  
221 not likely to regulate the enzymatic activities of the Rod system directly. To investigate  
222 whether MglA and MglB regulate the distribution of the Rod complexes, we used a fully  
223 functional, photoactivatable mCherry (PAmCherry)-labeled MreB variant (17) to mark  
224 the localization of Rod complexes in germination Phase II. When the majority of  
225 PAmCherry was photoactivated, MreB-PAmCherry appeared as small patches (17)  
226 (Fig. 4A). Compared to the wild-type spores where MreB patches mainly localized at  
227 nonpolar locations, many MreB patches formed near cell poles and bulges of the  
228 emerging  $\Delta mglA$  and  $\Delta mglB$  cells (Fig. 4A). We then photoactivate a few MreB-  
229 PAmCherry particles in each emerging cell and quantified their localization using photo-  
230 activatable localization microscopy (PALM). Along the long cell axis, we defined a  
231 region within 320 nm from each end of cell as the pole and the rest of the cell as the  
232 nonpolar region. In the emerging cells from wild-type spores that expressed MreB-  
233 PAmCherry, the ratio between nonpolar and polar-localized MreB fractions was 2.68 ( $n$   
234 = 573, Fig. 4B). In contrast, in the  $\Delta mglA$  and  $\Delta mglB$  backgrounds, this ratio decreased



235 to 1.06 (n = 713) and 1.41 (n = 812), respectively (Fig. 4B). Our data support that during  
236 the sphere-to-rod transition, MglA and expel MreB, and thus the Rod system, from cell  
237 poles.

238 MglA connects MreB to the gliding motors and the gliding motors drive the  
239 movement of MreB filaments (16, 17, 20). To test if MglA recruits the gliding motors to  
240 transport the Rod complexes to nonpolar locations through MreB, we investigated the  
241 regrowth process of the  $\Delta ag/QS$  pseudospores.  $\Delta ag/QS$  cells carry truncated gliding  
242 motors that are unable to drive the rapid motion of MreB filaments (17). Due to the  
243 truncation of motors, the  $\Delta ag/QS$  pseudospores lack compact polysaccharide layers on  
244 their surfaces (32). Phenocopying the  $\Delta mglA$  and  $\Delta mglB$  spores, elongation of  $\Delta ag/QS$   
245 pseudospores delayed significantly and many emerging cells displayed bulged surfaces  
246 in Phase II (Fig. 2). Consistently, significantly higher PG growth and MreB localization  
247 were observed at cell poles and bulges in the elongation phase (equivalent to Phase II  
248 of germination), similar to the observation made in  $\Delta mglA \Delta dacB$  and  $\Delta mglB \Delta dacB$   
249 spores (Fig. 2D, 4A, 4B). In summary, MglA and mglB restrict PG growth to nonpolar  
250 regions in germination Phase II utilizing the gliding motors, which transport the Rod  
251 complexes under the control of MglA.

## 252 Discussion

253 As spheres and rods are among the most common shapes adopted by walled bacteria,  
254 the sphere-to-rod transition during *M. xanthus* spore germination provides a unique  
255 opportunity to study rod-like morphogenesis in bacteria. Due to the absence of PG,  
256 glycerol-induced *M. xanthus* spores are especially valuable for the study of *de novo* PG  
257 synthesis, which drives spontaneous cell elongation in homogenous environments. In  
258 contrast to fruiting bodies that require millions of cells and days to form, glycerol-  
259 induced sporulation mimics the natural process that individual *M. xanthus* cells form  
260 spores within hours in response to environmental stresses. Without the protection from  
261 the fruiting body, rapid elongation could be critical for the survival of individual *M.*  
262 *xanthus* spores.

263 Based on the mutually exclusive localization of MglB and MglA-GTP in vegetative  
264 cells, we propose a model for spontaneous cell elongation during *M. xanthus* spore  
265 germination (Fig. 4C). We observed that MglB forms wandering clusters in Phase I of  
266 germination. Emerging cells start to elongate when the clusters of MglB stop moving  
267 and stabilize at what is to become a future pole. An important clue for understanding  
268 this process is that active PG growth prevents MglB clusters from settling down. Thus,  
269 the wandering dynamics of MglB clusters serves as a mechanism to survey the status  
270 of PG growth and the region where PG growth completes first in Phase I will host a  
271 MglB cluster and become a future pole in Phase II. MreB plays a key role in the  
272 stabilization of MglB clusters because both MglA and the Rod complexes assemble on  
273 MreB. Since MglB avoids colocalizing with MglA-GTP by converting the latter to MglA-  
274 GDP (18, 19) and MglA only binds to MreB (which also carries the Rod complexes) in

275 its GTP-bound form (16), the mutual exclusion between MglB and MglA-GTP will expel  
276 MglB clusters from the Rod complexes. Once an MglB cluster stabilizes at one pole, the  
277 expulsion between MglB and MglA-GTP causes MglA-GTP to cluster at the opposite  
278 side of the spore (Figure 7). Then the diametrically opposing clusters of MglA-GTP and  
279 MglB establish the polarity axis of the emerging cell.

280 A surprising finding of this work reveals that the MglA-MglB polarity axis regulates  
281 the distribution of Rod complexes through the gliding machineries. Essential for gliding  
282 motility, MreB serves as the platform for the assembly of the gliding machineries (12,  
283 33). For this reason, compared to its homologs in other bacteria, *M. xanthus* MreB  
284 displays unique dynamics: it is transported rapidly by the gliding motors, with a  
285 maximum velocity of near 3  $\mu\text{m/s}$  (17). At cell poles, MglA-GTP stimulates the assembly  
286 of the gliding machinery by directly connecting it to MreB (12, 16). Once assembled, the  
287 gliding machineries transport MreB filaments, thus entire Rod complexes, to nonpolar  
288 locations (Figure 7) (17, 20). Utilizing the same system that defines the leading-lagging  
289 axis in vegetative cells, spherical spores grow their walls at nonpolar regions and  
290 eventually form rods.

291 Consistent with our model, the connection between the Rod complexes and gliding  
292 machineries was also observed in a recent report, which showed that PG stops growing  
293 in vegetative cells when the gliding machineries are dedicated to gliding (12). The  
294 mechanism by which the gliding machineries switch between gliding and PG growth  
295 remains to be investigated. Nonetheless, our results have added another layer to the  
296 striking versatility of the gliding motors, which transport various cargos in different  
297 compartments of the cells: spore coats on cell surfaces (32), the Rod complex and

- 298 gliding proteins in the membrane and periplasm (12, 15), as well as MreB and gliding  
299 proteins in the cytoplasm (12, 17, 34).

## 300 **Materials and Methods**

301 **Strain construction.** Deletion and insertion mutants were constructed by  
302 electroporating *M. xanthus* cells with 4 µg plasmid DNA. Transformed cells were plated  
303 on CYE plates supplemented with 100 µg/ml sodium kanamycin sulfate or 10 µg/ml  
304 tetracycline hydrochloride. In-frame deletion of *dacB* is described in [SI Appendix,](#)  
305 [Materials and Methods, Table S2.](#)

306 **Sporulation, spore purification and germination.** Vegetative *M. xanthus* cells were  
307 grown in liquid CYE medium (10 mM MOPS pH 7.6, 1% (w/v) Bacto™ casitone (BD  
308 Biosciences), 0.5% yeast extract and 4 mM MgSO<sub>4</sub>) at 32 °C, in 125-ml flasks with  
309 rigorous shaking, or on CYE plates that contains 1.5% agar. When the cell culture  
310 reaches OD<sub>600</sub> 0.1 – 0.2, glycerol was added to 1 M to induce sporulation. After rigorous  
311 shaking overnight at 32 °C, remaining vegetative cells were eliminated by sonication  
312 and sonication-resistant spores were purified. Sonication-resistant spores were  
313 collected by centrifugation (1 min, 15,000 g and 4 °C). The pellet was washed three  
314 times with water. More details of spore purification and the purification of  $\Delta aglQS$   
315 pseudospores are provided in [SI Appendix, Materials and Methods.](#)

316 **Microscopy Analysis.** Cryo-ET was performed on a Polara G2™ electron microscope.  
317 Images were collected at 9,000× magnification and 8-µm defocus, resulting in 0.42  
318 nm/pixel. Data were acquired automatically with the SerialEM software (35). Time-lapse  
319 videos of the germination progress of wild-type and  $\Delta mgIA$  spores were recorded using  
320 an OMAX™ A3590U CCD camera and a Plan Flour™ 40×/0.75 Ph2 DLL objective on a  
321 phase-contrast Nikon Eclipse™ 600 microscope. The length, width and geometric  
322 aspect ratios (L/W) of spores/cells were determined from differential interference

323 contrast (DIC) images using a custom algorithm written in MATLAB (The MathWorks,  
324 Inc., Natick, MA), which is available upon request. DIC images of spores/cells were  
325 captured using a Hamamatsu ImagEM X2™ EM-CCD camera C9100-23B (effective  
326 pixel size 160 nm) on an inverted Nikon Eclipse-Ti™ microscope with a 100× 1.49 NA  
327 TIRF objective, which are also used for capturing regular fluorescence and PALM  
328 images. MgIB clusters and single-molecules were localized using an algorithm written in  
329 MATLAB (17), which is available upon request. More detailed information is provided in  
330 *SI Appendix, Materials and Methods.*

## 331 References

- 332 1. A. J. Meeske *et al.*, SEDS proteins are a widespread family of bacterial cell wall  
333 polymerases. *Nature* **537**, 634-638 (2016).
- 334 2. P. D. A. Rohs *et al.*, A central role for PBP2 in the activation of peptidoglycan  
335 polymerization by the bacterial cell elongation machinery. *PLoS Genet* **14**,  
336 e1007726 (2018).
- 337 3. S. van Teeffelen, L. D. Renner, Recent advances in understanding how rod-like  
338 bacteria stably maintain their cell shapes. *F1000Res* **7**, 241 (2018).
- 339 4. B. P. Bratton, J. W. Shaevitz, Z. Gitai, R. M. Morgenstein, MreB polymers and  
340 curvature localization are enhanced by RodZ and predict *E. coli*'s cylindrical  
341 uniformity. *Nature communications* **9**, 2797 (2018).
- 342 5. A. Colavin, H. Shi, K. C. Huang, RodZ modulates geometric localization of the  
343 bacterial actin MreB to regulate cell shape. *Nature communications* **9**, 1280  
344 (2018).
- 345 6. S. Hussain *et al.*, MreB filaments align along greatest principal membrane  
346 curvature to orient cell wall synthesis. *Elife* **7** (2018).
- 347 7. T. S. Ursell *et al.*, Rod-like bacterial shape is maintained by feedback between  
348 cell curvature and cytoskeletal localization. *Proc Natl Acad Sci U S A* **111**,  
349 E1025-1034 (2014).
- 350 8. F. Wong, E. C. Garner, A. Amir, Mechanics and dynamics of translocating MreB  
351 filaments on curved membranes. *Elife* **8** (2019).
- 352 9. R. M. Morgenstein *et al.*, RodZ links MreB to cell wall synthesis to mediate MreB  
353 rotation and robust morphogenesis. *Proc Natl Acad Sci U S A*  
354 10.1073/pnas.1509610112 (2015).
- 355 10. H. Cho *et al.*, Bacterial cell wall biogenesis is mediated by SEDS and PBP  
356 polymerase families functioning semi-autonomously. *Nat Microbiol*  
357 10.1038/nmicrobiol.2016.172, 16172 (2016).
- 358 11. T. K. Lee, K. Meng, H. Shi, K. C. Huang, Single-molecule imaging reveals  
359 modulation of cell wall synthesis dynamics in live bacterial cells. *Nature*  
360 *communications* **7**, 13170 (2016).
- 361 12. L. M. Faure *et al.*, The mechanism of force transmission at bacterial focal  
362 adhesion complexes. *Nature* **539**, 530-535 (2016).
- 363 13. E. M. Mauriello *et al.*, Bacterial motility complexes require the actin-like protein,  
364 MreB and the Ras homologue, MglA. *Embo J* **29**, 315-326 (2010).
- 365 14. B. Nan *et al.*, Flagella stator homologs function as motors for myxobacterial  
366 gliding motility by moving in helical trajectories. *Proc Natl Acad Sci U S A* **110**,  
367 E1508-1513 (2013).
- 368 15. B. Nan *et al.*, Myxobacteria gliding motility requires cytoskeleton rotation  
369 powered by proton motive force. *Proc Natl Acad Sci U S A* **108**, 2498-2503  
370 (2011).
- 371 16. A. Treuner-Lange *et al.*, The small G-protein MglA connects to the MreB actin  
372 cytoskeleton at bacterial focal adhesions. *J Cell Biol* **210**, 243-256 (2015).
- 373 17. G. Fu *et al.*, MotAB-like machinery drives the movement of MreB filaments during  
374 bacterial gliding motility. *Proc Natl Acad Sci U S A* **115**, 2484-2489 (2018).
- 375 18. S. Leonardy *et al.*, Regulation of dynamic polarity switching in bacteria by a Ras-  
376 like G-protein and its cognate GAP. *Embo J* **29**, 2276-2289 (2010).

- 377 19. Y. Zhang, M. Franco, A. Ducret, T. Mignot, A bacterial Ras-like small GTP-  
378 binding protein and its cognate GAP establish a dynamic spatial polarity axis to  
379 control directed motility. *PLoS Biol* **8**, e1000430 (2010).
- 380 20. B. Nan *et al.*, The polarity of myxobacterial gliding is regulated by direct  
381 interactions between the gliding motors and the Ras homolog MglA. *Proc Natl*  
382 *Acad Sci U S A* **112**, E186-193 (2015).
- 383 21. D. R. Zusman, A. E. Scott, Z. Yang, J. R. Kirby, Chemosensory pathways,  
384 motility and development in *Myxococcus xanthus*. *Nat Rev Microbiol* **5**, 862-872  
385 (2007).
- 386 22. M. Dworkin, S. M. Gibson, A System for Studying Microbial Morphogenesis:  
387 Rapid Formation of Microcysts in *Myxococcus xanthus*. *Science* **146**, 243-244  
388 (1964).
- 389 23. E. I. Tocheva *et al.*, Peptidoglycan transformations during *Bacillus subtilis*  
390 sporulation. *Mol Microbiol* **88**, 673-686 (2013).
- 391 24. K. Khanna *et al.*, The molecular architecture of engulfment during *Bacillus subtilis*  
392 sporulation. *Elife* **8** (2019).
- 393 25. N. K. Bui *et al.*, The peptidoglycan sacculus of *Myxococcus xanthus* has unusual  
394 structural features and is degraded during glycerol-induced myxospore  
395 development. *J Bacteriol* **191**, 494-505 (2009).
- 396 26. Y. P. Hsu *et al.*, Full color palette of fluorescent d-amino acids for in situ labeling  
397 of bacterial cell walls. *Chem Sci* **8**, 6313-6321 (2017).
- 398 27. E. Kuru *et al.*, In Situ probing of newly synthesized peptidoglycan in live bacteria  
399 with fluorescent D-amino acids. *Angew Chem Int Ed Engl* **51**, 12519-12523  
400 (2012).
- 401 28. M. F. Dion *et al.*, *Bacillus subtilis* cell diameter is determined by the opposing  
402 actions of two distinct cell wall synthetic systems. *Nat Microbiol* 10.1038/s41564-  
403 019-0439-0 (2019).
- 404 29. D. Keilberg, K. Wuichet, F. Drescher, L. Sogaard-Andersen, A response  
405 regulator interfaces between the Frz chemosensory system and the MglA/MglB  
406 GTPase/GAP module to regulate polarity in *Myxococcus xanthus*. *PLoS Genet* **8**,  
407 e1002951 (2012).
- 408 30. C. B. Pogue, T. Zhou, B. Nan, PlpA, a PilZ-like protein, regulates directed motility  
409 of the bacterium *Myxococcus xanthus*. *Mol Microbiol* **107**, 214-228 (2018).
- 410 31. Y. Zhang, M. Guzzo, A. Ducret, Y. Z. Li, T. Mignot, A dynamic response regulator  
411 protein modulates G-protein-dependent polarity in the bacterium *Myxococcus*  
412 *xanthus*. *PLoS Genet* **8**, e1002872 (2012).
- 413 32. M. Wartel *et al.*, A versatile class of cell surface directional motors gives rise to  
414 gliding motility and sporulation in *Myxococcus xanthus*. *PLoS Biol* **11**, e1001728  
415 (2013).
- 416 33. B. Nan, Bacterial Gliding Motility: Rolling Out a Consensus Model. *Curr Biol* **27**,  
417 R154-R156 (2017).
- 418 34. M. Sun, M. Wartel, E. Cascales, J. W. Shaevitz, T. Mignot, Motor-driven  
419 intracellular transport powers bacterial gliding motility. *Proc Natl Acad Sci U S A*  
420 **108**, 7559-7564 (2011).



- 421 35. D. N. Mastronarde, Automated electron microscope tomography using robust  
422 prediction of specimen movements. *Journal of Structural Biology* **152**, 36-51  
423 (2005).  
424

425 **ACKNOWLEDGEMENTS**

426 We thank Drs. Joseph Sorg and Ritu Shrestha for their help in the initial determination  
427 of germination phenotypes, Drs. Michael Van Nieuwenhze and Yen-Pang Hsu for  
428 providing TADA, and Drs. David Zusman, Michael Manson and Joseph Sorg for critical  
429 reading of this manuscript. This work is supported by the National Institute of Health  
430 R01GM129000 (to B.N.) and R01AI087946 (to J.L.) and by CNRS to T.M.

## 431 **Figure Legends**

432 **Figure 1. PG polymerization by the Rod complex is essential for *de novo***  
433 **establishment of rod-shape. A)** Morphological changes of untreated (UT) and  
434 inhibitor-treated wild-type spores in the germination process. Mecillinam (MEC, 100  
435  $\mu\text{g/ml}$ ), A22 (100  $\mu\text{g/ml}$ ) cefmetazole (CMZ, 5 mg/ml), cefsulodin (CSD, 5 mg/ml) and  
436 fosfomycin (FOF, 8 mg/ml). **B)** Quantitative analysis of the germination progress using  
437 the aspect ratios (L/W) of spores/cells. Boxes indicate the 25<sup>th</sup> - 75<sup>th</sup> percentiles,  
438 whiskers the 5<sup>th</sup> - 95<sup>th</sup> percentiles. In each box, the midline indicates the median and  $\times$   
439 indicates the mean (Also see [Table S1](#)). Outlier data points are shown as individual dots  
440 above and below the whiskers. **C)** Some oval spores initiate elongation along their short  
441 axes during Phase II of germination (also see [Movie S2](#)). **D)** Phase I spores become  
442 more spherical after 1-h treatments by mecillinam and A22 but initiate elongation earlier  
443 when treated by cefmetazole. **E)** Patterns of PG growth in both phases of germination  
444 were visualized by TADA labeling in  $\Delta dacB$  spores. The average and standard deviation  
445 of TADA intensity were calculated from 20 spores/cells in the diagrams to the right  
446 (same below). **F)** Imaged at different focal planes, 22.0% of Phase I spores show bright  
447 TADA patches (arrows) that position randomly on spore surfaces. **G)** Among these  
448 22.0% spores, many contain multiple TADA patches. **H)** Compared to untreated (UT)  
449  $\Delta dacB$  spores, while neither MEC, CMZ or CSD is able to block PG growth, the  
450 combination of all three antibiotics (+3) abolishes PG growth in Phase I of germination.  
451 In contrast, MEC alone is sufficient to inhibit PG growth in Phase II. Scale bars, 2  $\mu\text{m}$ . *p*  
452 values were calculated using the Student paired *t* test with a two- tailed distribution  
453 (same below). NS, nonsignificant difference.

454 **Figure 2. MglA and MglB are required for rapid cell elongation. A)** Emerging cells  
455 from  $\Delta mglA$ ,  $\Delta mglB$ ,  $mglA^{Q82L}$  spores and  $\Delta aglQS$  pseudospores show significant delay  
456 in elongation and crooked morphology in Phase II of germination. **B)** Quantitative  
457 analysis of the germination progress. **C)** A representative image of the altered  
458 morphology of the emerging  $\Delta mglA$  cells after 3-h of germination. Arrows point to the  
459 bulges that appear as additional poles. **D)** The disruption of either the MglA-MglB polar  
460 axis ( $\Delta mglA \Delta dacB$  and  $\Delta mglB \Delta dacB$ ) or the gliding motor ( $\Delta aglQS \Delta dacB$ ) resulted in  
461 significantly stronger PG growth at cell poles and buds (arrows) in Phase II.  
462 Quantitative analysis of TADA fluorescence is shown on the right. Scale bars, 2  $\mu\text{m}$ .

463 **Figure 3. MglB determines the first future pole. A, B)** While MglB-mCherry forms  
464 clusters in Phase I spores ( $L/W \leq 2$ ), MglA-YFP are largely diffusive in Phase I. Without  
465 MglB, MglA-YFP forms significantly less clusters in Phase II. For **(B)**, the total number  
466 of spores/cells analyzed for each strain is shown on top of the bar. **C)** 77.1% of MglB  
467 clusters (red arrow) showed “wandering” dynamics in Phase I spores. In Phase II, MglB  
468 clusters (yellow arrow) stabilized at cell poles and oscillated between opposite poles. As  
469 a control, a TADA patch (white arrow) on a Phase I spore did not move during the entire  
470 imaging process. **D)** The wandering behavior of MglB clusters depends on PG growth  
471 as the inhibitors of PG synthesis, A22, MEC, CMZ and CSD, all significantly inhibit the  
472 wandering of MglB in Phase I. In contrast, as the Rod system becomes the dominant  
473 PG synthesis machinery in Phase II, only A22 and MEC inhibit the wandering of MglB in  
474 Phase II. For each treatment, the total number of MglB clusters analyzed is shown on  
475 top of the bar. UT, untreated. **E)** The stabilization of MglB clusters at cell poles does not  
476 depend on local curvature. Scales bars, 2  $\mu\text{m}$ .

477 **Figure 4. The MglA-MglB polarity axis regulates PG growth through MreB and the**  
478 **gliding motor. A)** In the emerging  $\Delta mglA$ ,  $\Delta mglB$  and  $\Delta aglQS$  cells in Phase II of  
479 germination, MreB patches (arrows) are frequently detected near cell poles and bulges.  
480 **B)** The nonpolar-to-polar distribution ratios of MreB molecules were quantified by  
481 PALM. For each strain, the total number of MreB particles analyzed is shown on top of  
482 the bar. **C)** A schematic model for the *de novo* establishment of rod-shape by the MglA-  
483 MglB polarity axis. Scales bars, 2  $\mu\text{m}$ .

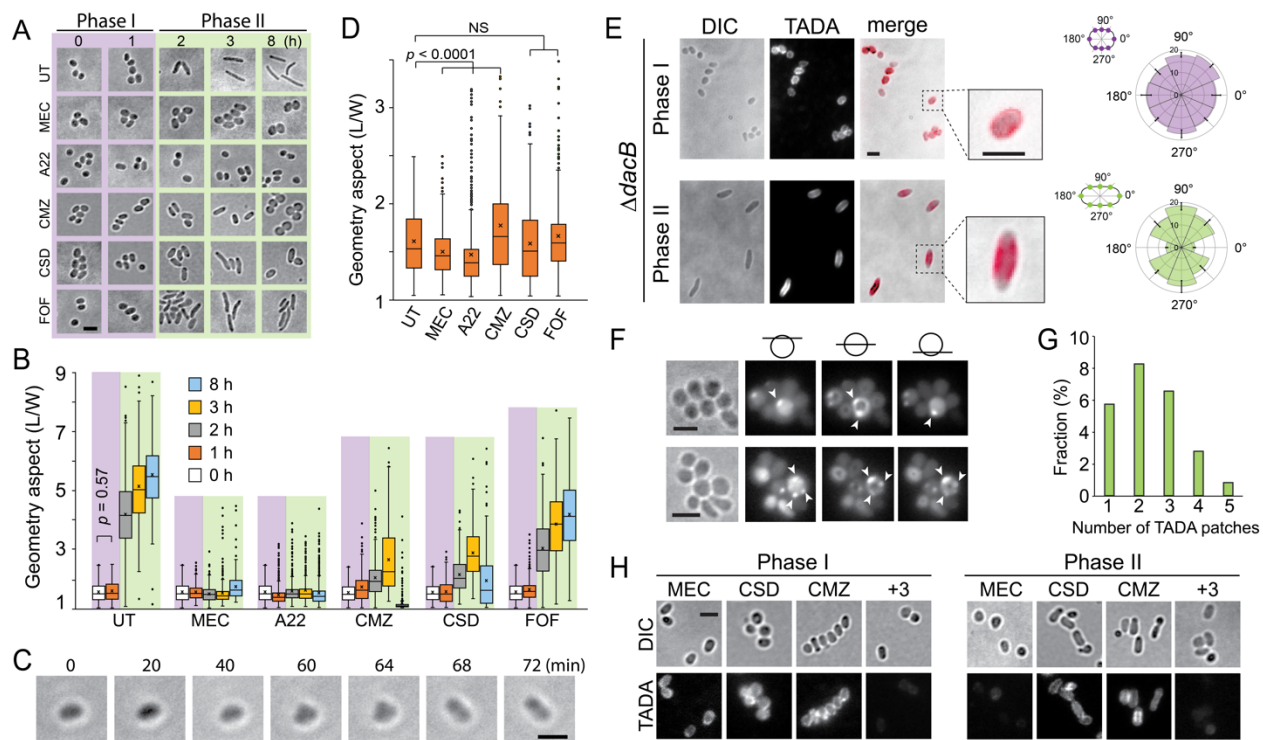

Fig. 1

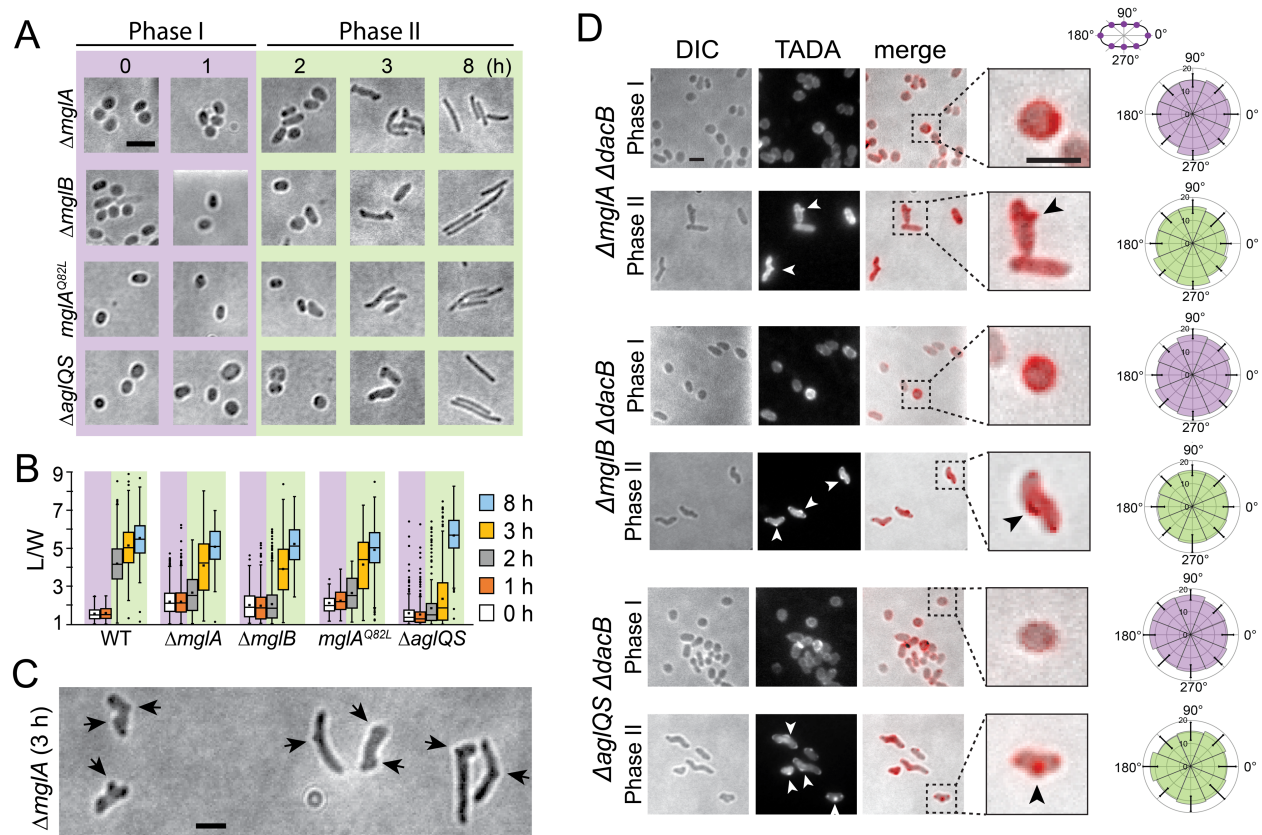

Fig. 2

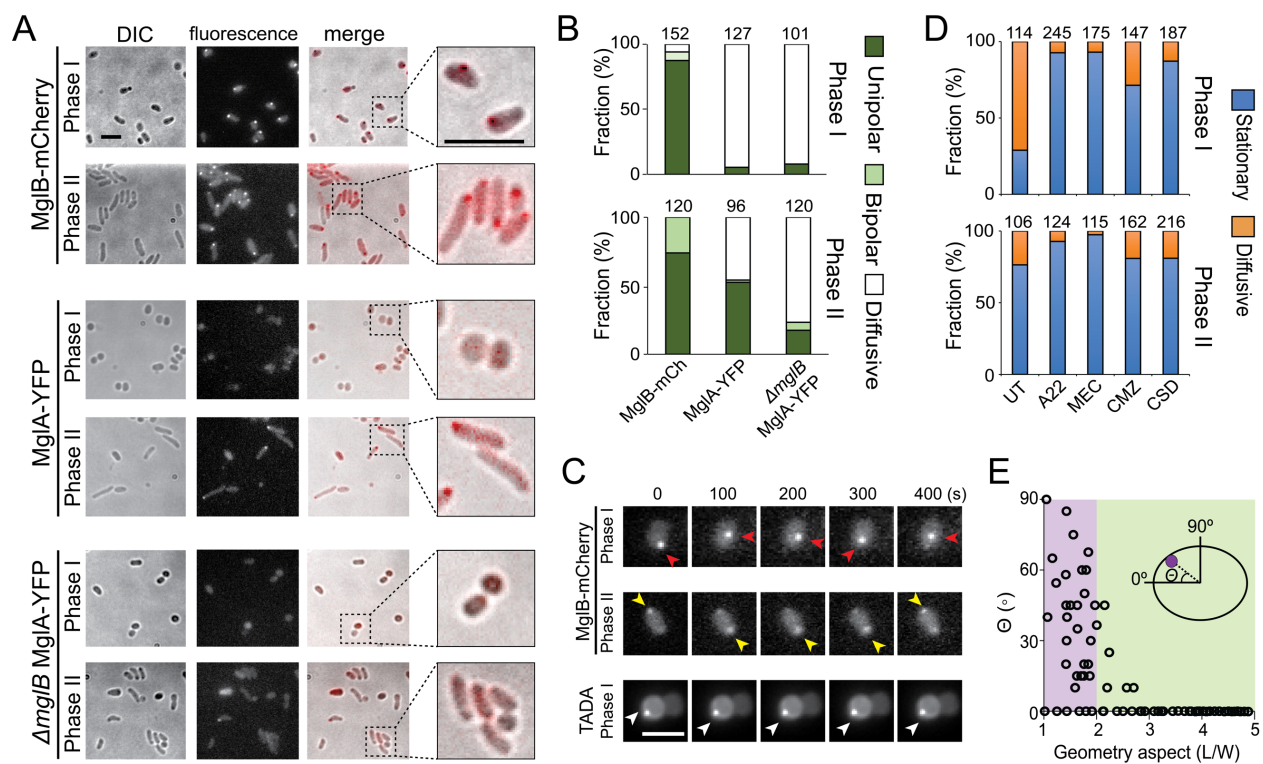

Fig. 3



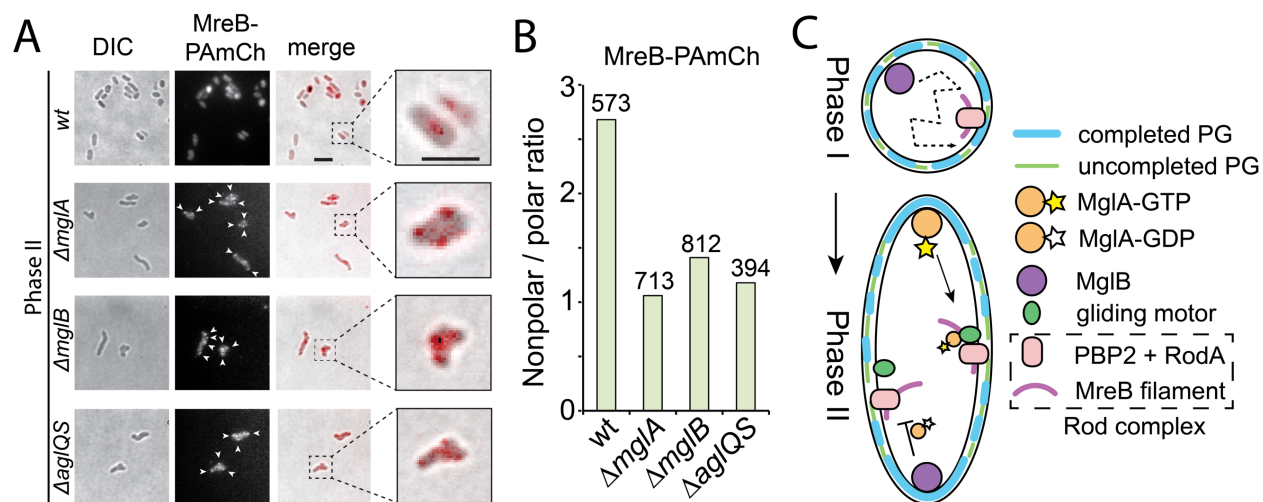

Fig. 4

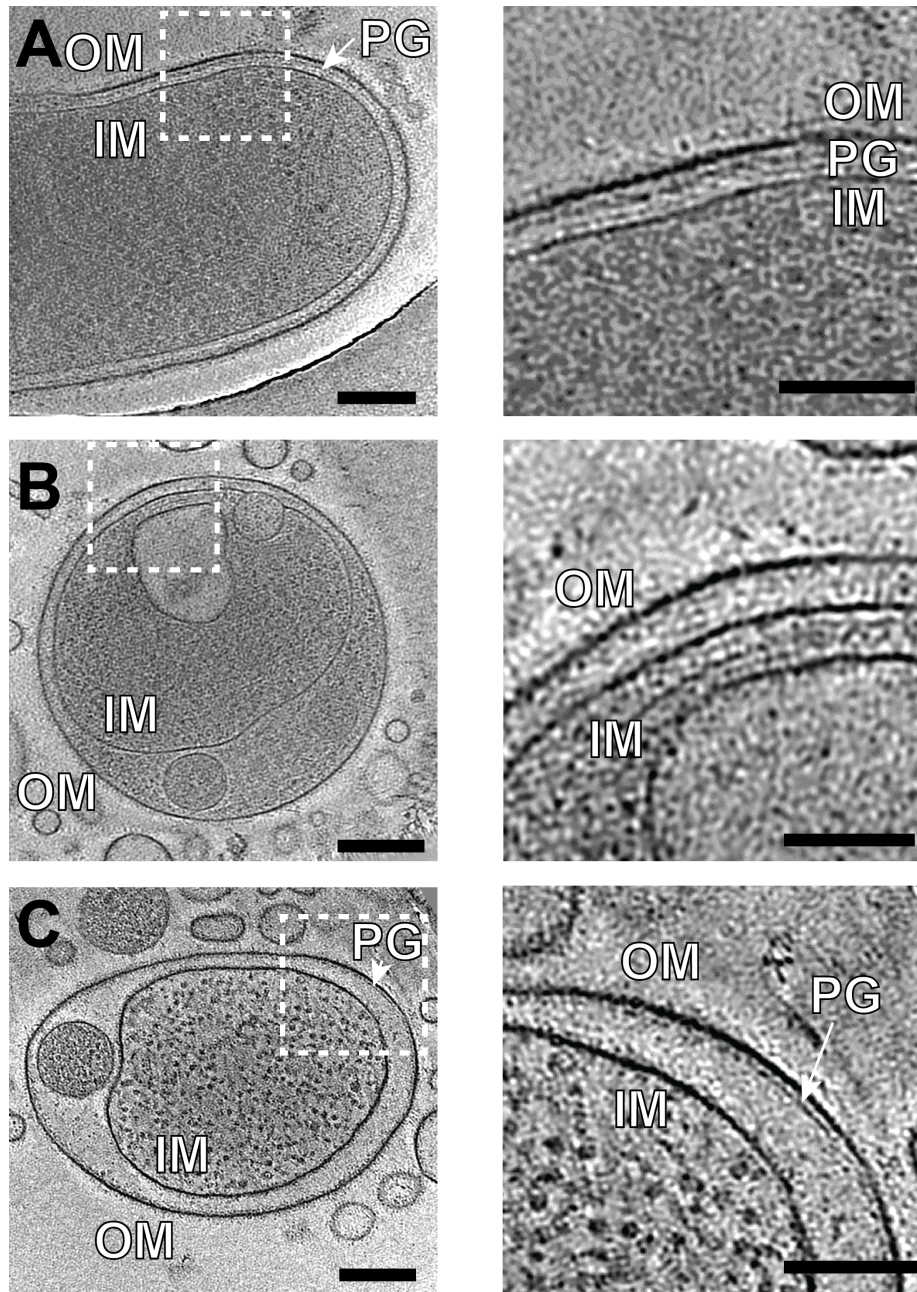

Fig. S1

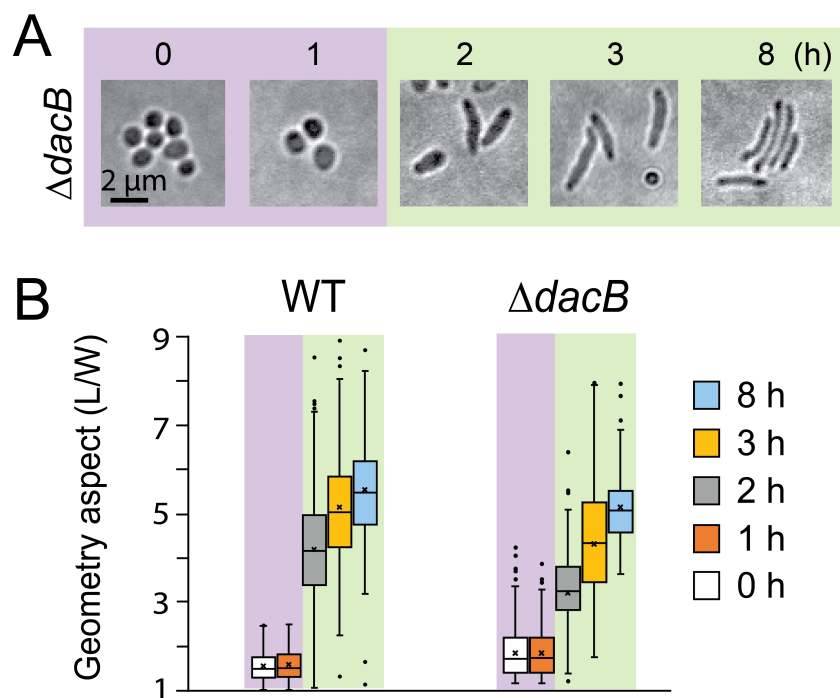

Fig. S2

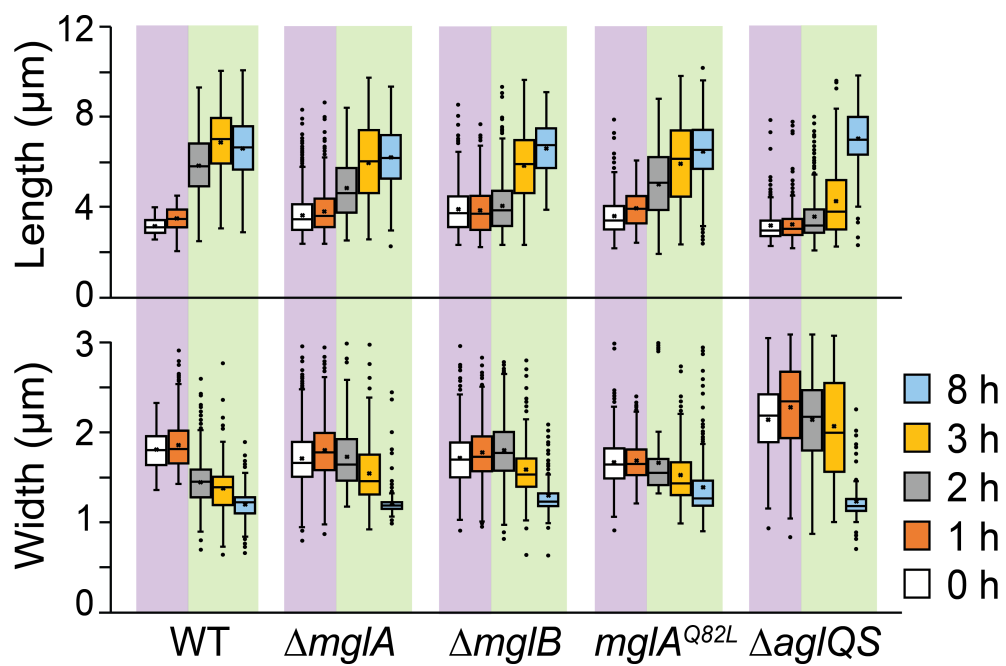

Fig. S3

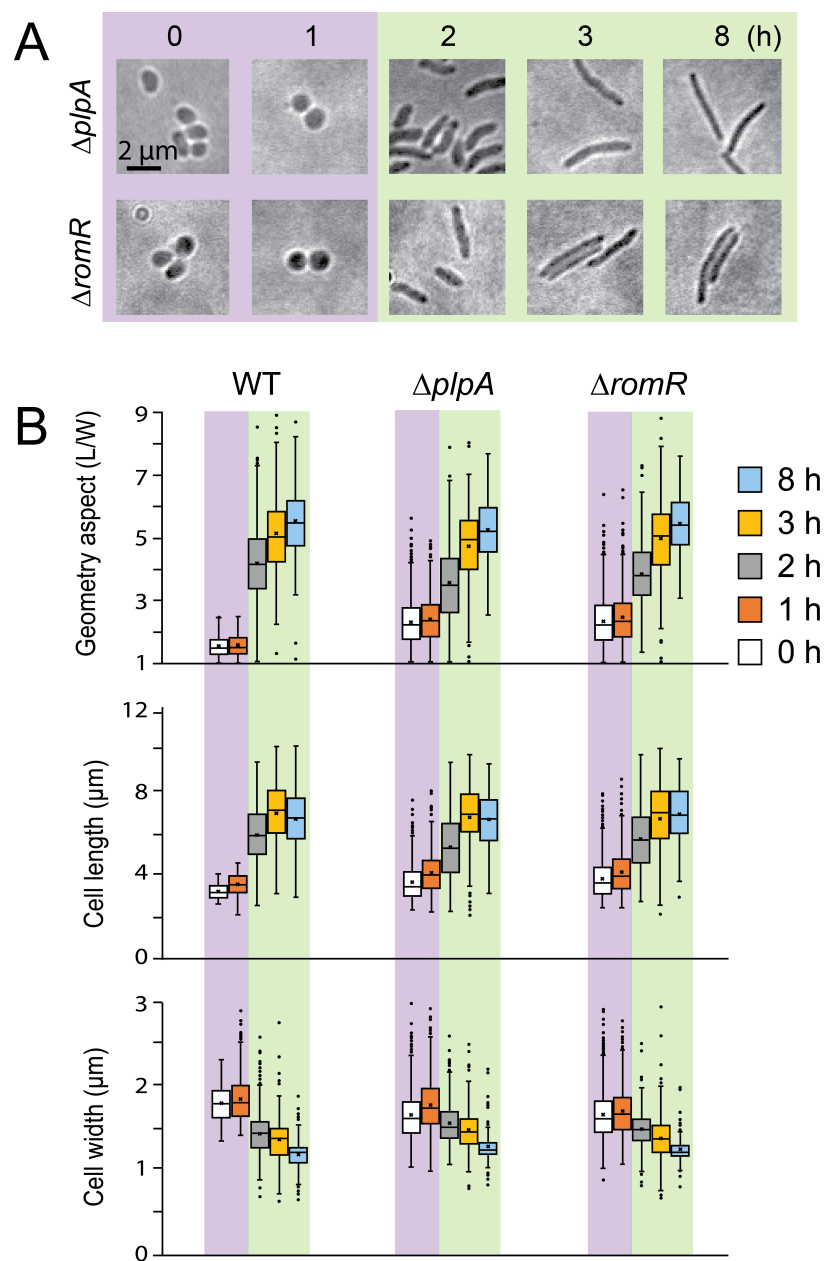

Fig. S4
