18 **ABSTRACT**

19 Chemical-induced spores of the Gram-negative bacterium *Myxococcus xanthus* are  
20 peptidoglycan (PG)-deficient. It is unclear how these spherical spores germinate into  
21 rod-shaped, walled cells without preexisting PG templates. We found that germinating  
22 spores first synthesize PG randomly on spherical surfaces. MglB, a GTPase-activating  
23 protein, forms a cluster that surveys the status of PG growth and stabilizes at one future  
24 cell pole. Following MglB, the Ras family GTPase MglA localizes to the second pole.  
25 MglA directs molecular motors to transport the bacterial actin homolog MreB and the  
26 Rod PG synthesis complexes away from poles. The Rod system establishes rod-shape  
27 by elongating PG at nonpolar regions. Thus, the interaction between GTPase,  
28 cytoskeletons and molecular motors provides a mechanism for the *de novo*  
29 establishment of rod-shape in bacteria.

30 **Significance**

31 Spheres and rods are among the most common shapes adopted by walled bacteria, in which  
32 the peptidoglycan (PG) cell wall largely determines cell shape. When induced by chemicals,  
33 rod-shaped vegetative cells of the Gram-negative bacterium *Myxococcus xanthus* thoroughly  
34 degrade their PG and shrink into spherical spores. As these spores germinate, rod-shaped cells  
35 are rebuilt without preexisting templates, which provides a rare opportunity to visualize *de novo*  
36 PG synthesis and bacterial morphogenesis. In this study, we investigated how spherical spores  
37 germinate into rods and elucidated a system for rod-shape morphogenesis that includes the  
38 Rod PG synthesis system, a GTPase-GAP pair, the MreB cytoskeleton and a molecular motor.

39 Morphogenesis is a fundamental feature of cells. Compared to spheres that are  
40 symmetric in all directions, rods are asymmetric and polarized. For most rod-shaped  
41 bacteria, the peptidoglycan (PG) cell wall defines cell geometry, which is assembled by  
42 two major enzymatic systems. The Rod system consists of RodA, a SEDS-family PG  
43 polymerase, PBP2, a member of the class B penicillin-binding proteins (bPBPs), and  
44 MreB, a bacterial actin homolog that orchestrates the activities of the Rod complexes in  
45 response to local cell curvature (1). In contrast, class A PBPs (aPBPs) contribute to PG  
46 growth independent of MreB (2, 3).

47 *Myxococcus xanthus*, a rod-shaped Gram-negative bacterium, utilizes polarized  
48 geometry for directed locomotion. MglA, a Ras family small GTPase, controls the  
49 direction of gliding motility (4-7). As cells move, GTP-bound MglA forms large clusters at  
50 leading cell poles, whereas GDP-bound MglA distributes homogeneously in the  
51 cytoplasm (4, 6, 7). MglA-GTP stimulates the assembly of the gliding machineries  
52 through direct interaction with MreB (7-10) and directs the gliding machineries toward  
53 lagging cell poles (5). Consequently, the gliding machineries carry MreB filaments as  
54 they move rapidly in the membrane (11-13). The activity of MglA is regulated by its  
55 cognate GTPase-activating protein (GAP), MglB, which forms large clusters at lagging  
56 cell poles. MglB activates the GTPase activity of MglA, expelling MglA-GTP, and thus  
57 the assembled gliding machineries, from lagging poles (4, 6). Overall, polarized  
58 localization and activities of MglA and MglB ensure that the of gliding machineries  
59 generate propulsion by moving from poles to nonpolar regions (5, 7, 14).

60 Some rod-shaped bacteria change their geometry through sporulation. In  
61 Firmicutes such as Bacilli and Clostridia, the morphological differentiation from rod-

62 shaped vegetative cells to oval spores begins with an asymmetric division, resulting in  
63 the formation of a smaller endospore wholly contained within a larger mother cell. In  
64 contrast to endospore-forming bacteria, *M. xanthus* produces spores using two division-  
65 independent mechanisms. First, groups of vegetative cells can aggregate on solid  
66 surfaces and build spore-filled fruiting bodies in a few days (15). Second, individual *M.*  
67 *xanthus* cells can form dispersed, spherical spores within hours in response to chemical  
68 signals, such as glycerol (16). Unlike endospores that contain intact and often thickened  
69 PG (17, 18), PG is thoroughly degraded in glycerol-induced *M. xanthus* spores (19).  
70 Without the polarity defined by PG, the mechanism by which these spores elongate into  
71 rods remains largely unknown.

## 72 **Results**

### 73 **Two-phase morphological transition during *M. xanthus* spore germination.**

74 Overnight induction of wild-type cells by 1 M glycerol produced sonication-resistant  
75 spores with length to width aspect ratios (L/W) of  $1.56 \pm 0.36$  (n = 789), among which  
76 40.9% are approximately spherical (L/W  $\leq 1.3$ ). Overall, the L/W values of most (85.4%)  
77 spores were lower than 2. As spores germinated, the morphological transition  
78 progressed in a two-phase manner. In the first hour (Phase I), L/W did not change  
79 significantly ( $p = 0.57$ , [Fig. 1A, 1B](#), [SI Appendix](#), [Movie S1](#), [Table S1](#)). After 1 h, L/W  
80 increased sharply as emerging cells transformed into rods (Phase II). Importantly,  
81 40.2% (n = 244) spores did not initiate elongation along their original long axes ([Fig. 1C](#),  
82 [SI Appendix](#), [Movie S2](#)), indicating that although not perfectly spherical, the geometry of  
83 mature spores does not predetermine the polarity of emerging cells. 70.2% (n = 198) of  
84 emerging cells reached the dimensions of vegetative cells by 3 h. After 8 h, the whole  
85 population of emerging cells is indistinguishable from vegetative cells (L/W =  $5.55 \pm$   
86  $1.12$ , n = 233. [Fig. 1A, 1B](#), [SI Appendix](#), [Movie S1](#), [Table S1](#)).

87 Using cryo-electron tomography (cryo-ET), we confirmed that mature glycerol-  
88 induced spores do not retain PG ([SI Appendix](#), [Fig. S1](#)). To investigate the role of PG  
89 growth in germination, we treated spores with several inhibitors for PG assembly. In the  
90 presence of A22, an inhibitor of MreB in the Rod system, spores failed to germinate into  
91 rods as their L/W ratios did not increase within 8 h. In contrast, when the wild-type MreB  
92 was replaced by MreB<sup>V323A</sup>, an A22-resistant variant (9), spores were able to elongate  
93 into rods in the presence of A22, indicating that A22 inhibits germination specifically  
94 through MreB ([Fig. 1A, 1B](#), [SI Appendix](#), [Table S1](#)). Similarly, mecillinam that inhibits

95 PBP2 in the Rod system also blocked germination (Fig. 1A, 1B, *SI Appendix, Table S1*).  
96 Both A22 and mecillinam-treated spores were viable because they were able to grow  
97 into rods when transferred into inhibitor-free medium. Since these spores became even  
98 more spherical in Phase I (Fig. 1D), neither A22 nor mecillinam blocked the hydrolysis  
99 of spore coats that maintain the shape of oval spores. In the presence of cefsulodin that  
100 inhibits PBP1A/B, and cefmetazole that inhibits all PBPs except PBP2, spores were  
101 able to form rods, albeit the elongation rate was slower (Fig. 1A, 1B, *SI Appendix, Table*  
102 *S1*). Although not essential for the initiation of cell elongation, aPBPs still contribute to  
103 the maintenance of rod shape. Despite successful elongation in early Phase II (1 – 3 h),  
104 57.2% (n = 215) cefsulodin-treated and 96.6% (n = 203) cefmetazole-treated emerging  
105 cells retrogressed to spheres after 8-h treatments (Fig. 1A, 1B, *SI Appendix, Table S1*),  
106 which is in agreement with a recent report that aPBPs are required for the mechanical  
107 stability of cells (20). L/W values of the cefmetazole-treated spores increased  
108 significantly in Phase I of germination ( $p < 0.0001$ , Fig. 1B, 1D, *SI Appendix, Table S1*),  
109 suggesting that cells elongate earlier when PBP2 is dominant over other PBPs.  
110 Vegetative *M. xanthus* cells are sensitive to fosfomicin, an antibiotic that inhibits the  
111 production of UDP-MurNAc, a precursor of PG (11). As spores preserve PG precursors  
112 (19), they were able to elongate into rods in the presence of fosfomicin, albeit at  
113 reduced rates (Fig. 1A, 1B, *SI Appendix, Table S1*). Taken together, PG polymerization  
114 by the Rod system is essential for the establishment of rod-shape.

115 Bacterial cells incorporate single D-amino acid-based fluorescent probes into PG  
116 using D, D- and L, D-transpeptidases that catalyze the last steps of PG polymerization  
117 (21). Such fluorescent D-amino acids could serve as proxy reporters for PG growth. We

118 next visualized the patterns of PG growth using a fluorescent D-amino acid, TAMRA 3-  
119 amino-D-alanine (TADA) (22), to label newly synthesized PG. To enhance labeling  
120 efficiency, we deleted the *dacB* gene (*mxan\_3130*), which encodes a D-Ala-D-Ala  
121 carboxypeptidase (23). The resulted  $\Delta dacB$  cells showed identical morphology to the  
122 wild-type ones and produced sonication-resistant spores. The  $\Delta dacB$  spores showed  
123 minor delay in germination and efficient TADA incorporation (Fig. 1E, SI Appendix, Fig.  
124 S2 and Table S1). Although L/W of spores did not change in Phase I, PG had started to  
125 grow. The surfaces of most Phase I spores (78.0%, n = 600) were evenly labeled by  
126 TADA (Fig. 1E). The remaining 22.0% of spores showed bright patches of TADA on  
127 their surfaces (Fig. 1F). However, these patches do not likely register future poles  
128 because 47.0% (n = 132) of such spores contained more than two TADA patches and  
129 these patches positioned randomly on spore surfaces (Fig. 1F, 1G). In contrast, as cells  
130 grew into rods, TADA was incorporated heavily at nonpolar regions and fluorescence  
131 signals were generally absent at cell poles (Fig. 1E). The patterns of PG growth indicate  
132 that spores first synthesize PG on their spherical surfaces in Phase I and then break  
133 symmetry in Phase II by growing PG at nonpolar regions.

134       Neither mecillinam, cefsulodin or cefmetazole was able to block TADA  
135 incorporation in Phase I of germination. However, a treatment by all three antibiotics  
136 abolished TADA incorporation (Fig. 1H), indicating that both aPBPs and the Rod system  
137 contribute to the isotropic PG growth in Phase I. In contrast, mecillinam, but not  
138 cefsulodin or cefmetazole, blocked TADA incorporation in Phase II of germination (Fig.  
139 1H). The coordination between aPBPs and the Rod system still remains to be fully  
140 understood. On the one hand, since cefsulodin and cefmetazole reduce the elongation



141 rates of emerging cells (Fig. 1A, 1B, *SI Appendix, Table S1*), aPBPs still participate in  
142 PG synthesis in Phase II of germination. But on the other hand, the activities of aPBPs  
143 might depend on the Rod system because mecillinam alone is sufficient to block TADA  
144 incorporation in Phase II. Consistent with a recent report that cells reduce their diameter  
145 when the Rod system becomes dominant over aPBPs (24), emerging cells continued to  
146 grow in length but shrink in width in Phase II (Fig. S3, *SI Appendix, Table S1*). These  
147 results confirm that while both aPBPs and the Rod system participate PG synthesis in  
148 germination, the Rod system plays major roles in cell elongation.

149 **MgIA and MgIB are required for rapid cell elongation.** To investigate how *M. xanthus*  
150 spores establish rod shape *de novo*, we tested the potential roles of polar-localized  
151 motility regulators.  $\Delta mgIA$  and  $\Delta mgIB$  cells were able to form sonication-resistant spores  
152 but their spores showed severe delays in elongation, especially in early Phase II of  
153 germination. After 3 h, only 15.7% of the  $\Delta mgIA$  (n= 140) and 10.4% of  $\Delta mgIB$  (n = 298)  
154 cells reached the vegetative aspect ratio (comparing to 70.2% of wild-type cells, Fig. 2A,  
155 2B, *SI Appendix, Table S1*). In contrast, deleting *romR* and *plpA*, the genes encode two  
156 additional polar-localized motility regulators (25-27), only caused minor delay in  
157 germination (*SI Appendix, Fig. S2 and Table S1*). Both the  $\Delta mgIA$  and  $\Delta mgIB$  spores  
158 were able to elongate in length and shrink in width, albeit at significantly lower rates  
159 (Fig. 2A, 2B, *SI Appendix, Table S1, Fig. S3*), indicating that PG growth by the Rod  
160 complex still occurred. Strikingly different from wild-type spores that maintained  
161 relatively smooth cell surfaces during germination, cells from the  $\Delta mgIA$  and  $\Delta mgIB$   
162 spores showed pronounced bulges at nonpolar regions in early Phase II, appearing to  
163 have multiple cell poles (Fig. 2A, 2C, *SI Appendix, Movie S3*). However, this

164 morphological defect was largely corrected after prolonged growth (8 h) (Fig. 2A),  
165 implying that a system independent of MglA and MglB was able to generate rod shape,  
166 although much less robustly. To determine how MglA and MglB regulate germination,  
167 we investigated the spores that expressed the MglA<sup>Q82L</sup> variant as the sole source of  
168 MglA, under the control of the native promoter of the *mgIBA* operon. MglA<sup>Q82L</sup>  
169 expresses normally but is unable to hydrolyze GTP (6). Spores expressing wild-type  
170 MglB and MglA<sup>Q82L</sup> showed both a severe delay in cell elongation and bulged surfaces  
171 on emerging cells, similar to the  $\Delta$ *mgIA* and  $\Delta$ *mgIB* spores (Fig. 2A, 2B, SI Appendix,  
172 Table S1). Surprisingly, overproducing MglB (*mgIB*<sup>OE</sup>), which potentially overstimulates  
173 the GTPase activity of MglA, caused similar defects during germination (Fig. 2A, 2B, SI  
174 Appendix, Table S1). Thus, fine-tuned GTPase activity of MglA is required for rapid cell  
175 elongation and MglB functions through MglA.

176 Both the delayed morphological transition and bulged surfaces of the emerging  
177  $\Delta$ *mgIA* and  $\Delta$ *mgIB* cells suggest that MglA and MglB might regulate PG growth during  
178 germination.  $\Delta$ *mgIA*  $\Delta$ *dacB* and  $\Delta$ *mgIB*  $\Delta$ *dacB* spores were able to grow PG in an  
179 isotropic manner in Phase I, indistinguishable from the  $\Delta$ *dacB* spores (Fig. 2D).  
180 However, emerging cells from both mutant spores displayed elevated PG growth at cell  
181 poles and bulges in Phase II (Fig. 2D).

182 Delayed elongation and uneven PG growth during germination could reduce the  
183 viability of  $\Delta$ *mgIA* and  $\Delta$ *mgIB* spores, especially under osmotic stresses. To test this  
184 hypothesis, we enumerated spores in cell-counting chambers and calculated their  
185 viability by dilution plating. To simplify cell-counting, *pilA* was disrupted by plasmid  
186 insertion (*pilA::tet*) to reduce cell aggregation caused by exopolysaccharides production

187 (28). As shown in Fig. 2E, compared to the *pilA::tet* spores that  $88.9 \pm 8.7\%$  (calculated  
188 from 3 independent experiments, same below) formed colonies, both  $\Delta mglA pilA::tet$   
189 and  $\Delta mglB pilA::tet$  spores formed colonies at reduced rates ( $54.1 \pm 6.7$  and  $49.4 \pm$   
190  $12.9\%$ , respectively). To further test if altered growth pattern reduces the strength of  
191 PG, we allow spores to germinate for 1 h, then incubated emerging cells in a  
192 hypoosmotic buffer (20 mM Tris-HCl, pH 7.6) for 1 h before plating. Hypoosmotic shock  
193 reduced the survival rate of *pilA::tet* spores to  $51.8 \pm 2.6\%$ , indicating that the still-  
194 growing PG in germination Phase II is sensitive to osmotic stress. Strikingly, after  
195 hypoosmotic shock, less than 15% of  $\Delta mglA pilA::tet$  ( $14.5 \pm 2.8\%$ ) and  $\Delta mglB pilA::tet$   
196 ( $8.7 \pm 2.4\%$ ) spores formed colonies (Fig. 2E). Taken together, the MglA-MglB polarity  
197 axis regulates PG growth in Phase II of germination, which plays important roles in the  
198 survival of glycerol-induced *M. xanthus* spores.

199 **MglB stabilizes at the first future pole.** We expressed YFP-labeled MglA as  
200 merodiploids in the wild-type background (6, 9) and mCherry-labeled MglB (stably  
201 expressed, *SI Appendix, Table S1, Fig. S2*) in the  $\Delta mglB$  mutant and correlated their  
202 localization patterns with germination progress (L/W). Spores from neither strain  
203 showed significant defects in germination (*SI Appendix, Table S1, Fig. S2*). 94.1% (n =  
204 152) of Phase I spores (L/W  $\leq 2$ ) contained one or two MglB clusters (Fig. 3A, 3B). In  
205 phase II spores (L/W  $> 2$ ), this ratio increased to 100% (n = 120). In contrast, MglA did  
206 not form clusters until Phase II, when 54.2% of emerging cells contained one or two  
207 MglA clusters (Fig. 3A, 3B). Thus, during germination, MglB establishes polarized  
208 localization before MglA.

209 To test if the clusters of MglB in Phase I spores mark the polarity inherited from  
210 previous vegetative cells, we imaged MglB clusters at 0.05 Hz. Surprisingly, the majority  
211 of MglB clusters in Phase I spores was highly dynamic (Fig. 3C, *SI Appendix*, *Movie*  
212 *S4*). Among 114 MglB clusters in Phase I spores, 22.9% remained stationary, and  
213 77.1% showed typical diffusion, with diffusion coefficients ( $D_{MglB}$ ) of  $1.05 \times 10^{-4} \pm 4.62 \times$   
214  $10^{-5} \mu\text{m}^2/\text{s}$ . These “wandering” MglB clusters were observed in both the approximately  
215 spherical ( $L/W < 1.3$ ) and oval spores ( $1.3 < L/W \leq 2$ ), which supports our hypothesis  
216 that, regardless of their geometry, polarity is not yet established in Phase I spores.

217 As germination progressed, MglB clusters started to stabilize. Strikingly, once  
218 stabilized, the locations of MglB clusters became one of the cell poles for cell elongation  
219 (Fig. 3D, *SI Appendix*, *Movie S5*). In Phase II of germination ( $L/W > 2$ ), the population  
220 of stationary MglB clusters increased from 22.9% to 76.4% ( $n = 106$ , Fig. 3E). Stabilized  
221 MglB clusters began to oscillate between newly established poles (Fig. 3C, *SI*  
222 *Appendix*, *Movie S6*), which might provide a mechanism to ensure that MglB occupies  
223 each future cell pole for an equal amount of time. As MglB clusters stabilized, MglA  
224 started to form clusters. The formation of MglA-YFP clusters was delayed significantly in  
225 the  $\Delta mglB$  background, and only 23.3% ( $n = 120$ ) of emerging cells contained MglA  
226 clusters in Phase II of germination (Fig. 3A, 3B). Among the 204 cells in which both  
227 proteins formed single clusters, 176 (86.3%) positioned MglA and MglB clusters at  
228 opposite poles (Fig. 3A, 3B). Thus, spherical spores start to elongate into rods along the  
229 axes established by the sequential stabilization of MglB and MglA clusters.

230 To investigate whether the stabilization of MglB clusters is predetermined by local  
231 cell curvatures, we quantified the localization of stationary MglB clusters with regard to

232 the geometry of spores. We divide each spore/cell envelope into four quarters. In the  
233 quarter that contained stationary MglB clusters, we defined the long and short axes as  
234  $0^\circ$  and  $90^\circ$ , which mark the local curvature that shows the highest and lowest similarity  
235 to the poles of vegetative cells, respectively. As shown in Fig. 3F, MglB clusters  
236 stabilized randomly in Phase I spores, indicating that local curvature does not dictate  
237 the localization of MglB. After the stabilization of MglB, the sites harboring MglB clusters  
238 transformed into cell poles ( $0^\circ$ ) in Phase II (Fig. 3F).

239 MglB clusters could stabilize at the sites where PG synthesis has completed or not  
240 yet initiated. We ruled out the second possibility because the majority of MglB clusters  
241 (76.4%,  $n = 106$ ) stabilizes at poles in Phase II (Fig. 3A, 3B), where almost no PG  
242 growth was observed later (Fig. 1E). In Phase I of germination, the population of static  
243 MglB clusters increased dramatically in the presence of A22, mecillinam, cefmetazole  
244 and cefsulodin (Fig. 3E), indicating that active PG growth prevents MglB clusters from  
245 settling down. Consistent with our finding that the Rod system becomes the dominant  
246 system for PG growth in Phase II (Fig. 1H), A22 and mecillinam further reduced the  
247 small population of diffusive MglB clusters in early Phase II, while cefmetazole and  
248 cefsulodin did not show significant effects (Fig. 3E). Taken together, it is the progress of  
249 PG growth, rather than the geometry of the spore, that regulates the dynamic of MglB  
250 clusters. As MglB clusters only stabilize at the sites where PG growth is completed, a  
251 region where PG synthesis completes first in Phase I will become a future cell pole.

252 **The MglA-MglB polarity axis regulates the distribution of the Rod system.** As the  
253 Rod complex is the major system for PG growth in Phase II, the MglA-MglB polarity axis  
254 might regulate cell elongation through the Rod complexes. However, MglA and MglB

255 are both cytoplasmic proteins, which are not likely to regulate the periplasmic activities  
256 of the Rod system directly. To visualize the distribution of the Rod complexes, we fused  
257 a DNA sequence encoding mCherry to the endogenous *rodA* gene in the wild-type  
258 background. The resulted strain showed minor delay of elongation during sporulation  
259 and was able to establish rod shape, indicating that the mCherry-labeled RodA retains  
260 its enzymatic activity (*SI Appendix, Fig. S2, Table S1*). RodA-mCherry formed clusters  
261 during both vegetative growth and germination (*Fig. 4A*). When imaged at 3.33 Hz,  
262 RodA clusters showed typical diffusion in vegetative cells, with  $D_{RodA} = (3.07 \pm 1.97) \times$   
263  $10^{-2} \mu\text{m}^2/\text{s}$  ( $n = 160$ ) (*SI Appendix, Movie. S7*). Importantly, mecillinam treatment did not  
264 affect the diffusivity of RodA clusters ( $(3.35 \pm 2.14) \times 10^{-2} \mu\text{m}^2/\text{s}$ ,  $n = 58$ ,  $p = 0.39$ ) (*SI*  
265 *Appendix, Movie. S8*), consistent with a previous report in *E. coli* that the diffusion of  
266 PBP2 does not correlate with its catalytic activity (29). Despite its negligible effect on  
267 diffusion, mecillinam significantly inhibited the formation of RodA clusters. During 150-s  
268 of imaging at 0.33 Hz, untreated vegetative cells in the exponential phase formed  $10.10$   
269  $\pm 3.41$  RodA clusters/cell ( $n = 50$ ). In the presence of mecillinam, this number  
270 decreased to  $3.06 \pm 1.06$  clusters/cell ( $n = 71$ ) (*Fig. 4A*). Based on the above  
271 observations, we reasoned that the formation of RodA clusters, rather than their  
272 diffusion, correlates with PG growth by the Rod complexes.

273 To investigate whether MglA and MglB regulate the distribution of the Rod  
274 complexes in Phase II of germination, we expressed RodA-mCherry endogenously in  
275  $\Delta\text{mglA}$  and  $\Delta\text{mglB}$  spores. Along the long axis of the emerging cells, we loosely defined  
276 a region within 320 nm from each end of cell as a “pole” (which contains the cell pole  
277 and its adjacent subpolar region) and the rest of the cell as the “nonpolar region”. In the

278 emerging cells from wild-type spores that expressed RodA-mCherry, the ratio between  
279 nonpolar and polar-localized RodA clusters was 1.45 (n = 387, Fig. 4B). In contrast, in  
280 the  $\Delta mglA$  and  $\Delta mglB$  backgrounds, this ratio decreased to 0.52 (n = 442) and 0.53 (n =  
281 787), respectively (Fig. 4B). Our data support the hypothesis that during the sphere-to-  
282 rod transition, the established MglA-MglB axis expels the Rod system from cell poles.

283 **The MglA-MglB polarity axis regulates the distribution of Rod complexes through**  
284 **MreB and the gliding motor.** The diffusion of RodA and MglB clusters is not likely  
285 connected. First,  $D_{RodA}$  is two orders of magnitude higher than  $D_{MglB}$ . Second, MglB only  
286 diffuses in Phase I of germination while RodA diffuses during both germination and  
287 vegetative growth. Thus, the MglA-MglB polarity axis does not likely regulate the  
288 distribution of Rod complexes directly. Since MglA and the Rod complex both bind to  
289 MreB, we hypothesized that the MglA-MglB polarity axis could regulate the distribution  
290 of Rod complexes through MreB. Although a photoactivatable mCherry (PAmCherry)-  
291 labeled MreB variant fully supports wild-type growth rate in vegetative cells (11), when  
292 expressed as the sole source of MreB, it failed to support rapid cell elongation in Phase  
293 II of germination. Nevertheless, spores expressing MreB-PAmCherry as merodiploids  
294 showed wild-type germination kinetics (*SI Appendix, Fig. S2, Table S1*), which were  
295 used to visualize the localization of MreB. When exposed to 405-nm excitation (0.2  
296 kW/cm<sup>2</sup>) for 2 s, the majority of PAmCherry was photoactivated (11, 13). MreB-  
297 PAmCherry localized diffusively in Phase I spores, excluding the possibility that  
298 localized MreB filaments predetermine the polarity of spores. MreB started to form small  
299 patches in Phase II (Fig. 4C). Compared to the wild-type spores where MreB patches  
300 mainly localized at nonpolar locations in germination Phase II, many MreB patches

301 formed near cell poles and bulges of the emerging  $\Delta mglA$  and  $\Delta mglB$  cells (Fig. 4C),  
302 consistent with the altered distribution of RodA clusters. While MreB might localize at  
303 bulges in response to altered local cell curvatures in these mutants (30-35), the  
304 aggregation of MreB at their poles is more likely due to the loss of the MglA-MglB  
305 polarity axis, because the poles of both wild-type and mutant cells have similar  
306 curvatures.

307 MglA connects MreB to the gliding motors and the gliding motors drive the  
308 movement of MreB filaments (5, 7, 11). To test if MglA recruits the gliding motors to  
309 transport the Rod complexes to nonpolar locations through MreB, we investigated the  
310 regrowth process of the  $\Delta ag/QS$  pseudospores that are sonication-sensitive due to the  
311 lack compact polysaccharide layers on their surfaces (36).  $\Delta ag/QS$  cells carry truncated  
312 gliding motors that are unable to drive the rapid motion of MreB filaments (11).  
313 Phenocopying the  $\Delta mglA$  and  $\Delta mglB$  spores, elongation of  $\Delta ag/QS$  pseudospores  
314 delayed significantly (Fig. 2A, 2B). Many emerging  $\Delta ag/QS$  cells displayed bulged  
315 surfaces in Phase II and survived at reduced rate, especially after hypoosmotic shock  
316 (Fig. 2A, 2E). Consistently, significantly higher PG growth was observed at cell poles  
317 and bulges in the elongation phase, similar to the observation made in  $\Delta mglA \Delta dacB$   
318 and  $\Delta mglB \Delta dacB$  spores (Fig. 2D). Accordingly, significantly higher fractions of RodA  
319 clusters and MreB filaments were observed at poles and bulges in elongating  $\Delta ag/QS$   
320 cells (Fig. 4B, 4C). In summary, MglA and MglB restrict PG growth to nonpolar regions  
321 in germination Phase II utilizing the gliding motors, which transport MreB, and thus the  
322 whole Rod complexes, under the control of MglA.



## 323 Discussion

324 As spheres and rods are among the most common shapes adopted by walled bacteria,  
325 the sphere-to-rod transition during *M. xanthus* spore germination provides a unique  
326 opportunity to study rod-like morphogenesis in bacteria. Due to the absence of PG,  
327 glycerol-induced *M. xanthus* spores are especially valuable for the study of *de novo* PG  
328 synthesis, which drives spontaneous cell elongation in homogenous environments. We  
329 observed that MglB forms wandering clusters in Phase I of germination and that an  
330 emerging cell starts to elongate when the MglB cluster stops moving and stabilizes at  
331 what is to become a future pole. The dynamics of MglB clusters is sensitive to the status  
332 of PG synthesis because active PG growth prevents MglB clusters from settling down.  
333 Since MglB avoids colocalizing with MglA-GTP by converting the latter to MglA-GDP (4,  
334 6), and MglA-GTP binds to MreB (which also carries the Rod complexes) (7), MglB  
335 clusters cannot stabilize at the sites where active PG synthesis by the Rod complex  
336 occurs. We propose that the wandering dynamics of MglB clusters serves as a  
337 mechanism to survey the status of PG growth and the region where PG growth  
338 completes first in Phase I will host a MglB cluster and become a future pole in Phase II  
339 (Fig. 5). Once an MglB cluster stabilizes at one pole, the expulsion between MglB and  
340 MglA-GTP causes MglA-GTP to cluster at the opposite side of the spore. At the poles  
341 that contain MglB clusters, MglB expels MglA-GTP and thus the Rod complexes from  
342 the poles. At the opposite poles, MglA-GTP stimulates the assembly of the gliding  
343 machinery by directly connecting it to MreB (7, 14). Once assembled, the gliding  
344 machineries transport MreB filaments, thus entire Rod complexes, away from the poles  
345 (5, 11) (Fig. 5). Taken together, the diametrically opposing clusters of MglA-GTP and

346 MglB establish the polarity axis of the emerging cell, which restricts the activity of the  
347 Rod complex to nonpolar locations (Fig. 5). Other regulators that modulate the gliding  
348 motors, such as PlpA and RomR, could also connect to the Rod system through MreB,  
349 and thus respond to the status of PG synthesis. Utilizing the same system that defines  
350 the leading-lagging axis in vegetative cells, spherical spores grow their walls at nonpolar  
351 regions and eventually form rods.

352 Our findings suggest that multiple factors contribute to the establishment of rod  
353 shapes, among which the MglA-MglB polarity axis plays a prominent role. In the  
354 absence of MglA and MglB, other polarity regulators, including PlpA and RomR that  
355 also regulate the gliding motors, and potentially asymmetrically-localizes cellular  
356 components such as to-be-identified germinant receptors, ribosomes and RNA  
357 polymerase, still drive cell elongation, albeit much slower. Understanding these failsafe  
358 mechanisms will pave the way for fully understanding the mechanism of rod-like  
359 morphogenesis. The mechanism by which the gliding machineries facilitate both gliding  
360 and PG growth remains to be investigated. Nonetheless, our results have added  
361 another layer to the striking versatility of the gliding motors, which transport various  
362 cargos in different compartments of the cells: spore coats on cell surfaces (36), the Rod  
363 complex and some gliding proteins in the membrane and periplasm (12, 14), as well as  
364 MreB and other gliding proteins in the cytoplasm (11, 14, 37).

## 365 **Materials and Methods**

366 **Strain construction.** Deletion and insertion mutants were constructed by  
367 electroporating *M. xanthus* cells with 4 µg plasmid DNA or 1 µg of chromosomal DNA.  
368 Transformed cells were plated on CYE plates supplemented with 100 µg/ml sodium  
369 kanamycin sulfate or 10 µg/ml tetracycline hydrochloride. In-frame deletion of *dacB* is  
370 described in [SI Appendix, Materials and Methods, Table S2](#).

371 **Sporulation, spore purification and germination.** Vegetative *M. xanthus* cells were  
372 grown in liquid CYE medium (10 mM MOPS pH 7.6, 1% (w/v) Bacto™ casitone (BD  
373 Biosciences), 0.5% yeast extract and 4 mM MgSO<sub>4</sub>) at 32 °C, in 125-ml flasks with  
374 rigorous shaking, or on CYE plates that contains 1.5% agar. When liquid cell culture  
375 reaches OD<sub>600</sub> 0.1 – 0.2, glycerol was added to 1 M to induce sporulation. After rigorous  
376 shaking overnight at 32 °C, remaining vegetative cells were eliminated by sonication  
377 and sonication-resistant spores were purified by centrifugation (1 min, 15,000 g and  
378 4 °C). The pellet was washed three times with water. More details of spore purification  
379 and the purification of  $\Delta aglQS$  pseudospores are provided in [SI Appendix, Materials and](#)  
380 [Methods](#).

381 **Microscopy Analysis.** Cryo-ET was performed on a Polara G2™ electron microscope.  
382 Images were collected at 9,000× magnification and 8-µm defocus, resulting in 0.42  
383 nm/pixel. Data were acquired automatically with the SerialEM software (38). Time-lapse  
384 videos of the germination progress of wild-type and  $\Delta mgIA$  spores were recorded using  
385 an OMAX™ A3590U CCD camera and a Plan Flour™ 40×/0.75 Ph2 DLL objective on a  
386 phase-contrast Nikon Eclipse™ 600 microscope. The length, width and geometric  
387 aspect ratios (L/W) of spores/cells were determined from differential interference

388 contrast (DIC) images using a custom algorithm written in MATLAB (The MathWorks,  
389 Inc., Natick, MA), which is available upon request. DIC images of spores/cells were  
390 captured using a Hamamatsu ImagEM X2™ EM-CCD camera C9100-23B (effective  
391 pixel size 160 nm) on an inverted Nikon Eclipse-Ti™ microscope with a 100× 1.49 NA  
392 TIRF objective, which are also used for capturing fluorescence images. MgIB and RodA  
393 clusters were localized using an algorithm written in MATLAB (11), which is available  
394 upon request. More detailed information is provided in *SI Appendix, Materials and*  
395 *Methods*.

## 396 References

- 397 1. S. van Teeffelen, L. D. Renner, Recent advances in understanding how rod-like  
398 bacteria stably maintain their cell shapes. *F1000Res* **7**, 241 (2018).
- 399 2. H. Cho *et al.*, Bacterial cell wall biogenesis is mediated by SEDS and PBP  
400 polymerase families functioning semi-autonomously. *Nat Microbiol*  
401 10.1038/nmicrobiol.2016.172, 16172 (2016).
- 402 3. T. K. Lee, K. Meng, H. Shi, K. C. Huang, Single-molecule imaging reveals  
403 modulation of cell wall synthesis dynamics in live bacterial cells. *Nature*  
404 *communications* **7**, 13170 (2016).
- 405 4. S. Leonardy *et al.*, Regulation of dynamic polarity switching in bacteria by a Ras-  
406 like G-protein and its cognate GAP. *Embo J* **29**, 2276-2289 (2010).
- 407 5. B. Nan *et al.*, The polarity of myxobacterial gliding is regulated by direct  
408 interactions between the gliding motors and the Ras homolog MglA. *Proc Natl*  
409 *Acad Sci U S A* **112**, E186-193 (2015).
- 410 6. Y. Zhang, M. Franco, A. Ducret, T. Mignot, A bacterial Ras-like small GTP-  
411 binding protein and its cognate GAP establish a dynamic spatial polarity axis to  
412 control directed motility. *PLoS Biol* **8**, e1000430 (2010).
- 413 7. A. Treuner-Lange *et al.*, The small G-protein MglA connects to the MreB actin  
414 cytoskeleton at bacterial focal adhesions. *J Cell Biol* **210**, 243-256 (2015).
- 415 8. B. Nan, M. J. McBride, J. Chen, D. R. Zusman, G. Oster, Bacteria that glide with  
416 helical tracks. *Curr Biol* **24**, R169-R173 (2014).
- 417 9. E. M. Mauriello *et al.*, Bacterial motility complexes require the actin-like protein,  
418 MreB and the Ras homologue, MglA. *Embo J* **29**, 315-326 (2010).
- 419 10. B. Nan, Bacterial Gliding Motility: Rolling Out a Consensus Model. *Curr Biol* **27**,  
420 R154-R156 (2017).
- 421 11. G. Fu *et al.*, MotAB-like machinery drives the movement of MreB filaments during  
422 bacterial gliding motility. *Proc Natl Acad Sci U S A* **115**, 2484-2489 (2018).
- 423 12. B. Nan *et al.*, Myxobacteria gliding motility requires cytoskeleton rotation  
424 powered by proton motive force. *Proc Natl Acad Sci U S A* **108**, 2498-2503  
425 (2011).
- 426 13. B. Nan *et al.*, Flagella stator homologs function as motors for myxobacterial  
427 gliding motility by moving in helical trajectories. *Proc Natl Acad Sci U S A* **110**,  
428 E1508-1513 (2013).
- 429 14. L. M. Faure *et al.*, The mechanism of force transmission at bacterial focal  
430 adhesion complexes. *Nature* **539**, 530-535 (2016).
- 431 15. D. R. Zusman, A. E. Scott, Z. Yang, J. R. Kirby, Chemosensory pathways,  
432 motility and development in *Myxococcus xanthus*. *Nat Rev Microbiol* **5**, 862-872  
433 (2007).
- 434 16. M. Dworkin, S. M. Gibson, A System for Studying Microbial Morphogenesis:  
435 Rapid Formation of Microcysts in *Myxococcus xanthus*. *Science* **146**, 243-244  
436 (1964).
- 437 17. E. I. Tocheva *et al.*, Peptidoglycan transformations during *Bacillus subtilis*  
438 sporulation. *Mol Microbiol* **88**, 673-686 (2013).
- 439 18. K. Khanna *et al.*, The molecular architecture of engulfment during *Bacillus subtilis*  
440 sporulation. *Elife* **8** (2019).

- 441 19. N. K. Bui *et al.*, The peptidoglycan sacculus of *Myxococcus xanthus* has unusual  
442 structural features and is degraded during glycerol-induced myxospore  
443 development. *J Bacteriol* **191**, 494-505 (2009).
- 444 20. A. Vigouroux *et al.*, Class-A penicillin binding proteins do not contribute to cell  
445 shape but repair cell-wall defects. *Elife* **9** (2020).
- 446 21. E. Kuru *et al.*, Mechanisms of incorporation for D-amino acid probes that target  
447 peptidoglycan biosynthesis. *ACS Chem Biol* 10.1021/acscchembio.9b00664  
448 (2019).
- 449 22. Y. P. Hsu *et al.*, Full color palette of fluorescent d-amino acids for in situ labeling  
450 of bacterial cell walls. *Chem Sci* **8**, 6313-6321 (2017).
- 451 23. E. Kuru *et al.*, In Situ probing of newly synthesized peptidoglycan in live bacteria  
452 with fluorescent D-amino acids. *Angew Chem Int Ed Engl* **51**, 12519-12523  
453 (2012).
- 454 24. M. F. Dion *et al.*, *Bacillus subtilis* cell diameter is determined by the opposing  
455 actions of two distinct cell wall synthetic systems. *Nat Microbiol* 10.1038/s41564-  
456 019-0439-0 (2019).
- 457 25. D. Keilberg, K. Wuichet, F. Drescher, L. Sogaard-Andersen, A response  
458 regulator interfaces between the Frz chemosensory system and the MglA/MglB  
459 GTPase/GAP module to regulate polarity in *Myxococcus xanthus*. *PLoS Genet* **8**,  
460 e1002951 (2012).
- 461 26. C. B. Pogue, T. Zhou, B. Nan, PlpA, a PilZ-like protein, regulates directed motility  
462 of the bacterium *Myxococcus xanthus*. *Mol Microbiol* **107**, 214-228 (2018).
- 463 27. Y. Zhang, M. Guzzo, A. Ducret, Y. Z. Li, T. Mignot, A dynamic response regulator  
464 protein modulates G-protein-dependent polarity in the bacterium *Myxococcus*  
465 *xanthus*. *PLoS Genet* **8**, e1002872 (2012).
- 466 28. T. Zhou, B. Nan, Exopolysaccharides promote *Myxococcus xanthus* social  
467 motility by inhibiting cellular reversals. *Mol Microbiol* **103**, 729-743 (2017).
- 468 29. T. K. Lee *et al.*, A dynamically assembled cell wall synthesis machinery buffers  
469 cell growth. *Proc Natl Acad Sci U S A* **111**, 4554-4559 (2014).
- 470 30. B. P. Bratton, J. W. Shaevitz, Z. Gitai, R. M. Morgenstein, MreB polymers and  
471 curvature localization are enhanced by RodZ and predict *E. coli*'s cylindrical  
472 uniformity. *Nature communications* **9**, 2797 (2018).
- 473 31. A. Colavin, H. Shi, K. C. Huang, RodZ modulates geometric localization of the  
474 bacterial actin MreB to regulate cell shape. *Nature communications* **9**, 1280  
475 (2018).
- 476 32. S. Hussain *et al.*, MreB filaments align along greatest principal membrane  
477 curvature to orient cell wall synthesis. *Elife* **7** (2018).
- 478 33. T. S. Ursell *et al.*, Rod-like bacterial shape is maintained by feedback between  
479 cell curvature and cytoskeletal localization. *Proc Natl Acad Sci U S A* **111**,  
480 E1025-1034 (2014).
- 481 34. F. Wong, E. C. Garner, A. Amir, Mechanics and dynamics of translocating MreB  
482 filaments on curved membranes. *Elife* **8** (2019).
- 483 35. R. M. Morgenstein *et al.*, RodZ links MreB to cell wall synthesis to mediate MreB  
484 rotation and robust morphogenesis. *Proc Natl Acad Sci U S A*  
485 10.1073/pnas.1509610112 (2015).

- 486 36. M. Wartel *et al.*, A versatile class of cell surface directional motors gives rise to  
487 gliding motility and sporulation in *Myxococcus xanthus*. *PLoS Biol* **11**, e1001728  
488 (2013).
- 489 37. M. Sun, M. Wartel, E. Cascales, J. W. Shaevitz, T. Mignot, Motor-driven  
490 intracellular transport powers bacterial gliding motility. *Proc Natl Acad Sci U S A*  
491 **108**, 7559-7564 (2011).
- 492 38. D. N. Mastronarde, Automated electron microscope tomography using robust  
493 prediction of specimen movements. *Journal of Structural Biology* **152**, 36-51  
494 (2005).  
495

496 **ACKNOWLEDGEMENTS**

497 We thank Autumn Ridge and Elias Topo for technical assistance, Drs. Joseph Sorg and  
498 Ritu Shrestha for their help in the initial determination of germination phenotypes, Drs.  
499 Michael Van Nieuwenhze and Yen-Pang Hsu for providing TADA, and Drs. David  
500 Zusman, Michael Manson and Joseph Sorg for critical reading of this manuscript. This  
501 work is supported by the National Institute of Health R01GM129000 (to B.N.) and  
502 R01AI087946 (to J.L.) and by CNRS to T.M.



503 **Figures**

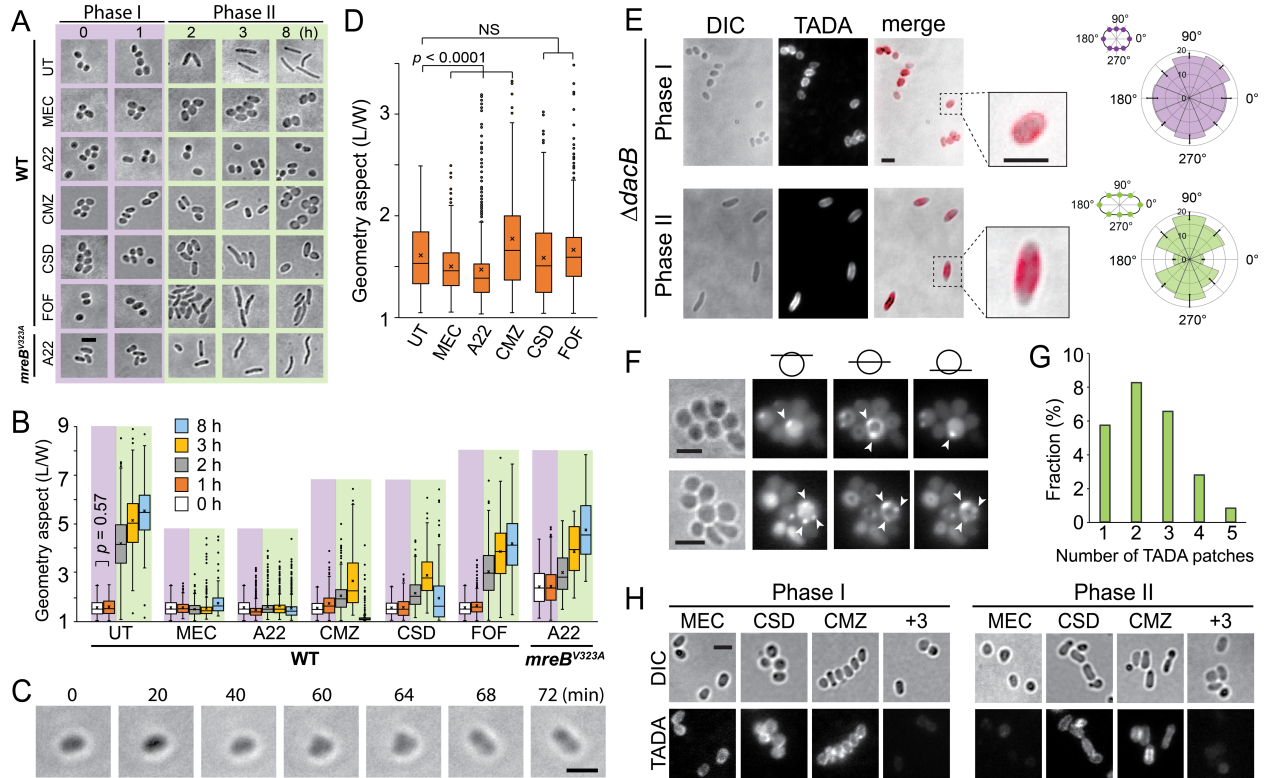

504

505 **Fig. 1. PG polymerization by the Rod system is essential for *de novo***

506 **establishment of rod-shape. A)** Morphological changes of untreated (UT) and

507 inhibitor-treated spores in the germination process. A22 (10  $\mu$ g/ml), mecillinam (MEC,

508 100  $\mu$ g/ml), cefmetazole (CMZ, 5 mg/ml), cefsulodin (CSD, 5 mg/ml) and fosfomycin

509 (FOF, 8 mg/ml). **B)** Quantitative analysis of the germination progress using the aspect

510 ratios (L/W) of spores/cells. Boxes indicate the 25<sup>th</sup> - 75<sup>th</sup> percentiles, whiskers the 5<sup>th</sup> -

511 95<sup>th</sup> percentiles. In each box, the midline indicates the median and  $\times$  indicates the mean

512 (same below, [Table S1](#)). Outlier data points are shown as individual dots above and

513 below the whiskers. **C)** An oval spore initiates elongation along its short axes ([Movie](#)

514 [S2](#)). **D)** Phase I spores become more spherical after 1-h treatments by A22 and

515 mecillinam. Cefmetazole-treated spores initiate elongation earlier than untreated ones.

516 **E)** Patterns of PG growth in both phases of germination were visualized by TADA in  
517  $\Delta dacB$  spores. The average and standard deviation of TADA intensity were calculated  
518 from 20 spores/cells in the diagrams to the right (same below). **F)** Imaged at different  
519 focal planes, 22.0% of Phase I spores show bright TADA patches (arrows) that position  
520 randomly on spore surfaces. **G)** Among these 22.0% spores, many contain multiple  
521 TADA patches. **H)** Compared to untreated (UT)  $\Delta dacB$  spores, while neither MEC, CMZ  
522 or CSD is able to block PG growth, the combination of all three antibiotics (+3)  
523 abolishes PG growth in Phase I of germination. In contrast, MEC alone is sufficient to  
524 inhibit PG growth in Phase II. Scale bars, 2  $\mu\text{m}$ .  $p$  values were calculated using the  
525 Student paired  $t$  test with a two- tailed distribution (same below). NS, nonsignificant  
526 difference.

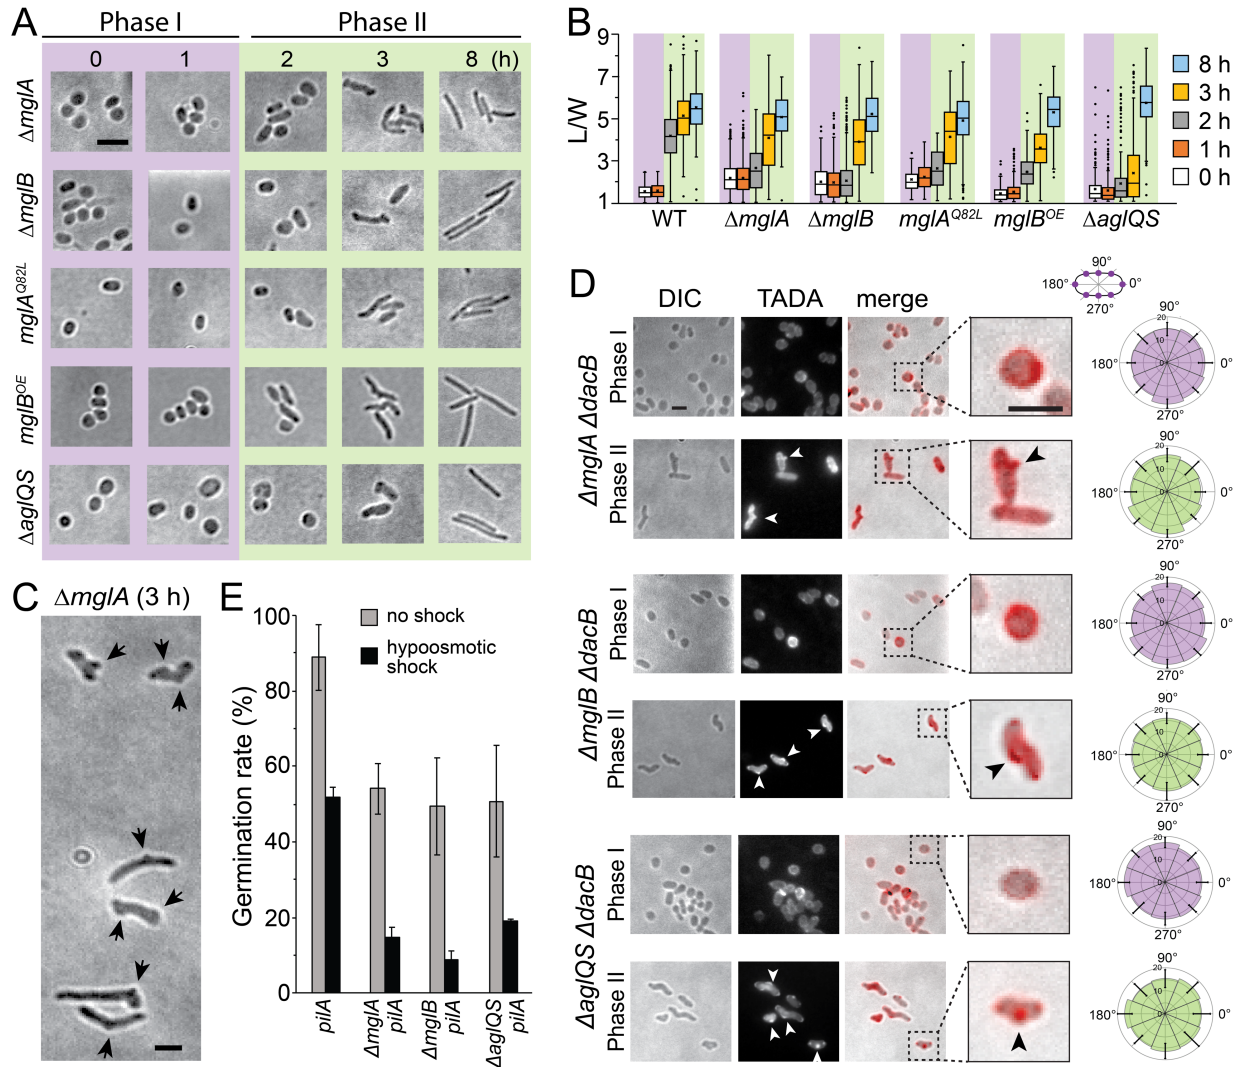

527

528 **Fig. 2. MglA and MglB are required for rapid cell elongation. A)** Emerging cells from

529  $\Delta mglA$ ,  $\Delta mglB$ ,  $mglA^{Q82L}$  and  $mglB^{OE}$  spores and  $\Delta aglQS$  pseudospores show

530 significant delay in elongation and bulges on cell surfaces in Phase II of germination. **B)**

531 Quantitative analysis of the germination progress. **C)** A representative image of the

532 altered morphology of the emerging  $\Delta mglA$  cells after 3-h of germination. Arrows point

533 to the bulges on cell surfaces. **D)** The disruption of either the MglA-MglB polar axis

534 ( $\Delta mglA \Delta dacB$  and  $\Delta mglB \Delta dacB$ ) or the gliding motor ( $\Delta aglQS \Delta dacB$ ) resulted in

535 significantly stronger PG growth at cell poles and bulges (arrows) in Phase II.

536 Quantitative analysis of TADA fluorescence is shown on the right. **E)** The disruption of  
537 either the MglA-MglB polar axis ( $\Delta mglA pilA::tet$  and  $\Delta mglB pilA::tet$ ) or the gliding motor  
538 ( $\Delta aglQS pilA::tet$ ) significantly decreases the survival rate of germinating spores (gray  
539 bars), especially under osmotic stress (black bars). Scale bars, 2  $\mu\text{m}$ .

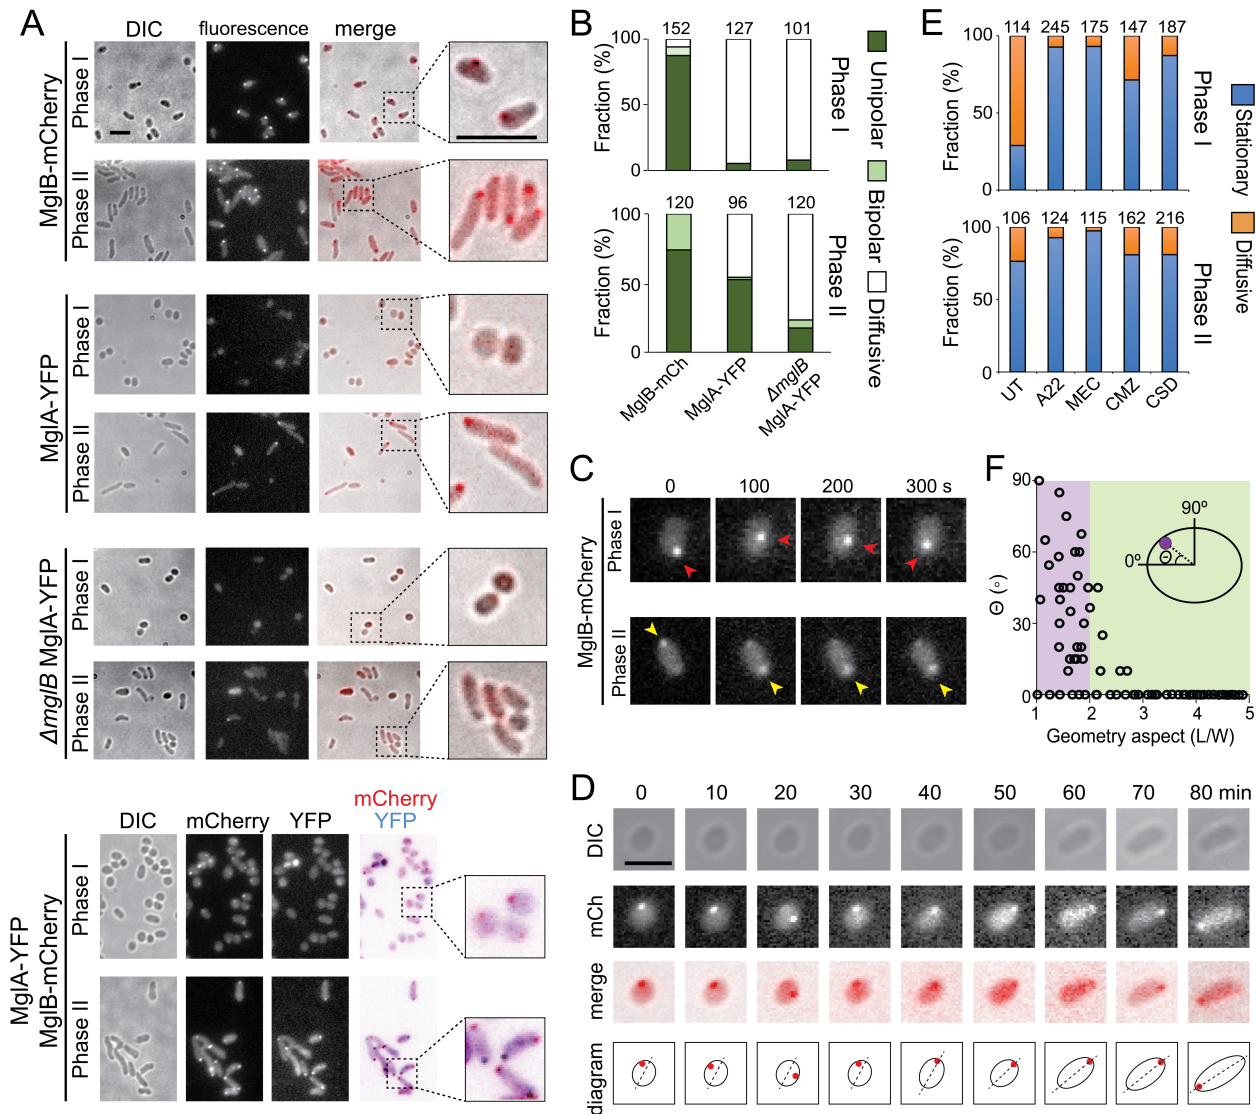

540

541 **Fig. 3. MglB stabilizes at the first future pole. A)** While MglB-mCherry forms clusters

542 in germination Phase I, MglA-YFP starts to forms clusters in Phase II. In the absence of

543 MglB, MglA-YFP forms significantly fewer clusters. MglA and MglB clusters stabilize at

544 opposite cell poles. **B)** Quantification of the sequential stabilization of MglB and MglA

545 clusters. The total number of spores/cells analyzed for each strain is shown on top of

546 each bar. **C)** The “wandering” dynamics of MglB clusters (red arrow) in Phase I spores

547 (Movie S4). In Phase II, MglB clusters (yellow arrow) stabilized at cell poles and

548 oscillated between opposite poles (Movie S6). **D)** As the MglB cluster stabilizes at one

549 future pole, the emerging cell starts to elongate ([Movie S5](#)). **E**) Inhibitors of PG  
550 synthesis, A22, MEC, CMZ and CSD, all inhibit the wandering of MglB in Phase I. In  
551 contrast, only A22 and MEC, the inhibitors of the Rod system, inhibit the wandering of  
552 MglB significantly in Phase II. For each treatment, the total number of MglB clusters  
553 analyzed is shown on top of each bar. UT, untreated. **F**) The stabilization of MglB  
554 clusters does not depend on local curvature. Scales bars, 2  $\mu\text{m}$ .

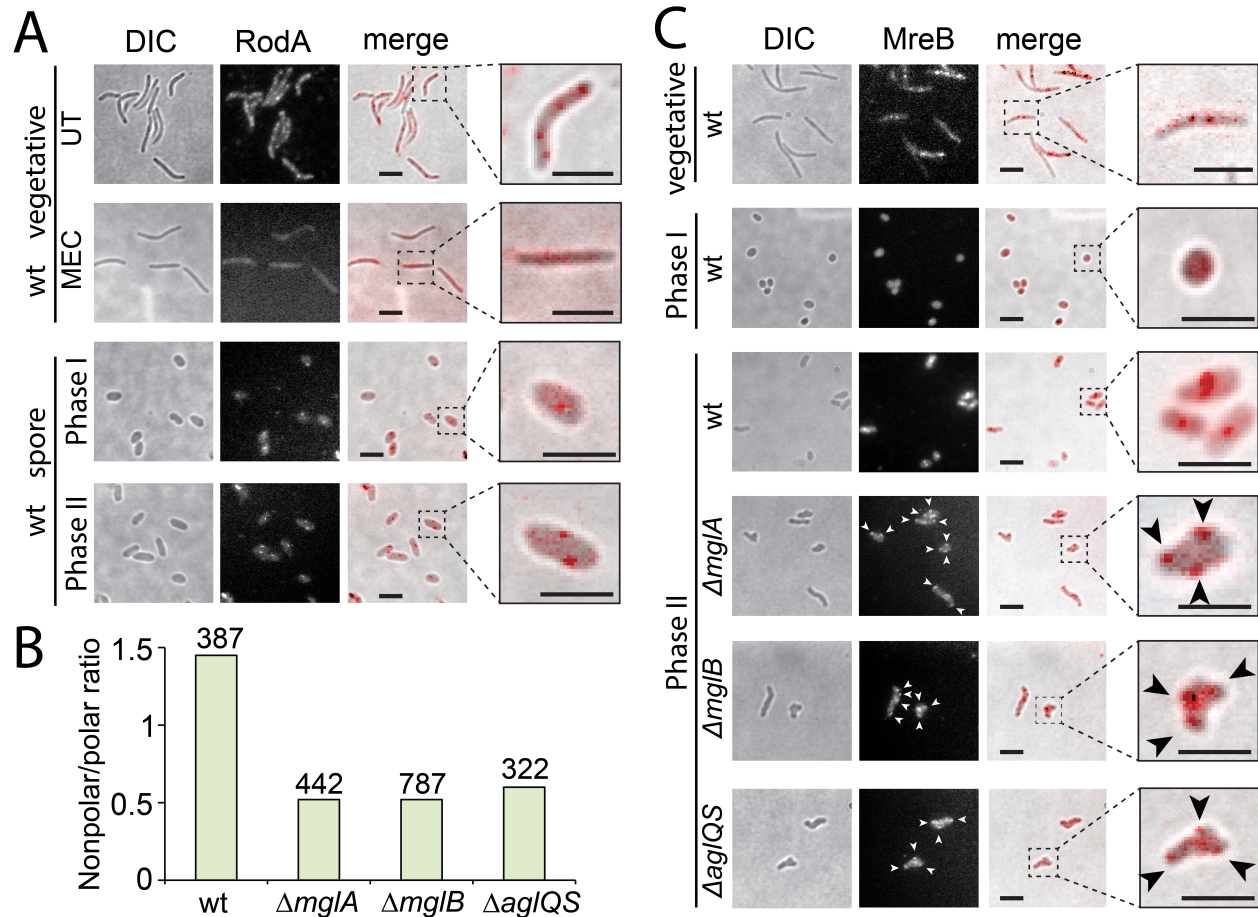

555

556

557

558

559

560

561

562

563

564

**Fig. 4. The MglA-MglB polarity axis regulates the distribution of Rod complexes through MreB and the gliding motor. A)** RodA forms clusters during both vegetative growth and germination. Mecillinam reduces the formation of RodA clusters in vegetative cells. **B)** Nonpolar-to-polar distribution ratios of RodA clusters in the elongating cells of germination Phase II. The total number of RodA clusters analyzed is shown on top of each bar. **C)** The localization patterns of MreB filaments. Consistent with the altered distribution of RodA cluster, MreB patches (arrows) are frequently detected near cell poles and bulges in the emerging  $\Delta mglA$ ,  $\Delta mglB$  and  $\Delta aglQS$  cells in Phase II of germination. Scales bars, 2  $\mu$ m

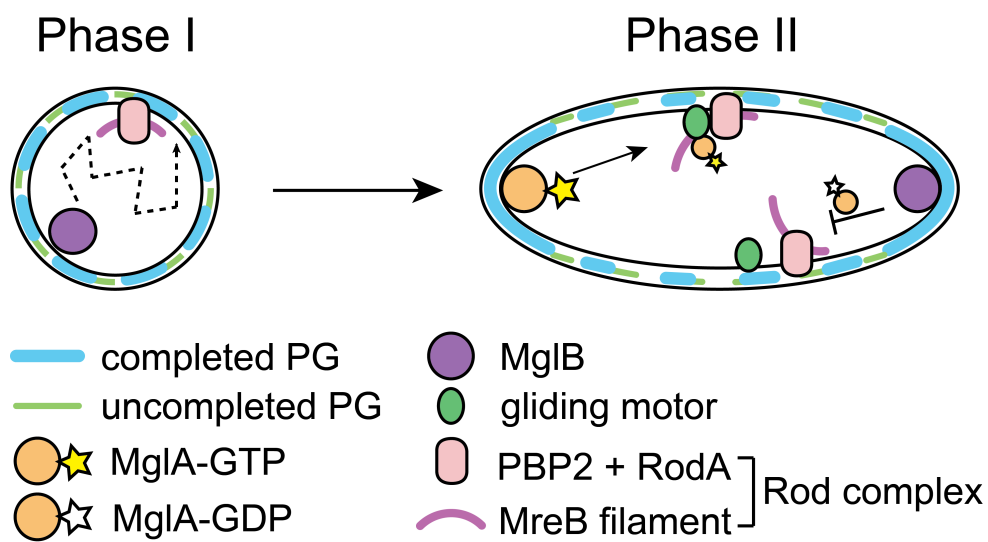

565

566 **Fig.5.** A schematic model for the *de novo* establishment of rod-shape by the MglA-MglB

567 polarity axis.
