# Supplementary material for: Establishing Rod-Shape from Spherical, Peptidoglycan-Deficient Bacterial Spores
Source: bioRxiv or medRxiv preprint supplement (doi:10.1101/818641), 2020-01-23
Supplement: Supplementary file [file media-1.pdf]

# 1 **SI APPENDIX**

## 2 **MATERIALS AND METHODS**

### 3 **Strain Construction**

4 In-frame deletion cassettes of *dacB* and the insertion cassette for RodA-labeling were  
5 amplified with polymerase chain reaction (PCR) using chromosomal DNA as template,  
6 digested and inserted into plasmid pBJ113 (1) to produce pBN $\Delta$ *dacB* and pBN-*rodA*-  
7 *mCherry*. For the labeling of RodA, Protein sequence SGGGGSGGGGSGGGGS was  
8 used as the linker between RodA and mCherry. All constructs were confirmed by DNA  
9 sequencing. Transformants were obtained by homologous recombination and confirmed  
10 by PCR. Strains, plasmids and PCR primers are listed in [Table S2](#).

### 11 **Immunoblot analysis**

12 For each strain, cells were grown in CYE medium to OD<sub>600</sub> 1.0. 20- $\mu$ l culture were lysed  
13 using 2 $\times$  SDS loading buffer, subjected to electrophoresis using 4 – 15% gradient gels  
14 (Bio-rad) and blotted onto Amersham™ Hybond™ 0.2  $\mu$ m PVDF blotting membranes  
15 (GE healthcare). MglB and MglB-mCherry were detected using anti-MglB antibodies (2);  
16 mCherry and RodA-mCherry, monoclonal anti-mCherry antibodies (abcam). Protein  
17 bands were visualized using horseradish peroxidase-conjugated goat-anti-rabbit  
18 secondary antibodies (Thermo Sceintific), the Pierce™ ECL blotting substrate (Thermo  
19 Sceintific), and the Amersham Hyperfilm™ ECL chemiilluminescence films (GE  
20 Healthcare).

### 21 **Sporulation, spore purification and germination**

22 To eliminate vegetative cells from spores, 400  $\mu$ l of cell culture was transferred to a 1.5-  
23 ml microcentrifuge tube, sonicated eight times on ice for 2 s each, at 2-s intervals. The

24 elimination of vegetative cells was confirmed by DIC or phase contrast microscopy.  
25 Additional sonication cycles were applied when vegetative cells still remained.

26 The  $\Delta ag/QS$  pseudospores are nonresistant to sonication (3). Nevertheless, as we  
27 used the aspect ratio L/W, rather than OD, to quantify symmetry-breaking, the observed  
28 delay in morphological transition is not likely due to the low survival rate of  $\Delta ag/QS$   
29 pseudospores. In addition, these surviving  $\Delta ag/QS$  pseudospores regrew into rods in  
30 the same two-phase manner as the wild-type spores (Fig. 2). The  $\Delta ag/QS$   
31 pseudospores were purified by centrifugation with sucrose gradient. 1 ml culture that  
32 contains  $\Delta ag/QS$  pseudospores was first collected by centrifugation (20 min, 1,800 g  
33 and room temperature). Then the pellet was washed three times with water, suspended  
34 in 2 ml water, pipetted to the top layer of a 35-ml centrifuge tube that contained 8 ml of  
35 60% sucrose solution, and sedimented by centrifugation (20 min, 1,800 g and room  
36 temperature). The pellet was collected and washed with water five times.

37 Purified spores and pseudospores were suspended in water. Their ODs were  
38 measured at 600 nm and diluted to 0.5. To induce germination and regrowth, 1 ml of  
39 spores/pseudospores were collected again by centrifugation (1 min, 15,000 g and room  
40 temperature), suspended in 1 ml of liquid germination CYE (CYE medium  
41 supplemented with additional 0.2% casitone and 1 mM  $\text{CaCl}_2$ ) and incubated in an 18-  
42 mm test tube at 32 °C, with vigorous shaking. To measure the germination and regrowth  
43 rates of the *pilA::tet*,  $\Delta mgIA pilA::tet$ ,  $\Delta mgIB pilA::tet$  spores and the  $\Delta ag/QS pilA::tet$   
44 pseudospores, spores/pseudospores were enumerated in bacterial cell counting  
45 chambers and dilution plated on solid CYE agar. Colonies were then counted after 120-  
46 h incubation at 32 °C. Hypoosmotic shock was performed on Phase II

47 spores/pseudospores. Spores/pseudospores were enumerated, suspended in 1 ml of  
48 liquid germination CYE and incubated at 32 °C for 1 h, with vigorous shaking.  
49 Germinating spores/pseudospores were washed three times using 20 mM Hris-HCl  
50 pH7.6 and incubated in the same buffer for 1 h before being plated on CYE agar.  
51 Colonies were then counted after 120-h incubation at 32 °C. For inhibitor treatments,  
52 the minimum inhibitory concentration (MIC) of each inhibitor was determined on CYE  
53 agar using wild-type vegetative *M. xanthus* cells. For each inhibitor, 2 × MIC was used  
54 in both germination assay and TADA-labeling.

### 55 **Bright field microscopy and cell geometry analysis**

56 5 µl of spore/cell suspension was spotted on a germination CYE agar (1.5%) pad of  
57 ~0.5-mm thickness. Time-lapse videos of the germination progress of wild-type and  
58  $\Delta$ *mgIA* spores were recorded using an OMAX™ A3590U CCD camera and a Plan  
59 Flour™ 40×/0.75 Ph2 DLL objective on a phase-contrast Nikon Eclipse™ 600  
60 microscope. Germination temperature was maintained at 32 °C using an AmScope™  
61 TCS-100 slide warmer. The length, width and geometric aspect ratios (L/W) of  
62 spores/cells were determined from differential interference contrast (DIC) images using  
63 a custom algorithm written in MATLAB (The MathWorks, Inc., Natick, MA), which is  
64 available upon request. DIC images of spores/cells were captured using a Hamamatsu  
65 ImagEM X2™ EM-CCD camera C9100-23B (effective pixel size 160 nm) on an inverted  
66 Nikon Eclipse-Ti™ microscope with a 100× 1.49 NA TIRF objective.

### 67 **Cryo-ET**

68 Vegetative cells and glycerol-induced spores of wild-type *M. xanthus* were mixed with  
69 BSA-golds as the fiducial marker before being transferred onto EM grids. The samples

70 on EM grids were blotted by Whatman filter paper and rapidly plunge-frozen in liquid  
71 ethane in a homemade plunger apparatus (4). The hydrated samples on EM  
72 grids were transferred into liquid nitrogen before imaging. EM grids were then  
73 transferred to a Polara G2™ electron microscope. Images were collected at 9,000×  
74 magnification and 8-μm defocus, resulting in 0.42 nm/pixel. Data were acquired  
75 automatically with the SerialEM software (5). A total dose of 50 e/Å<sup>2</sup> was distributed  
76 among 35 tilt images covering angles from -51° to 51° at tilt steps of 3°. For every single  
77 tilt series collection, the dose-fractionated mode was used to generate 8 to 10 frames  
78 per projection image. Collected dose-fractionated data were first subjected to the motion  
79 correction program to generate drift-corrected stack files (6, 7). Contrast transfer-  
80 function correction of individual tilt images was performed using the function of  
81 *ctfphaseflip* implemented in IMOD (8). Tilt series were aligned in IMOD using gold  
82 fiducial markers and the alignment stacks were binned at 2 times (0.82 nm/pixel) to  
83 generate tomograms using SIRT reconstruction (9, 10).

#### 84 **TADA labeling**

85 Lyophilized TADA was dissolved in DMSO at 150 mM and stored at -20 °C. The  
86 labeling was performed at 32 °C, using 1 μl of the TADA solution for 1ml of germinating  
87 spores. To visualize PG growth in Phase I, we added TADA to the medium at the  
88 beginning of germination and allowed *ΔdacB* spores to germinate for 1 h. To visualize  
89 PG growth in Phase II, we allowed spores to germinate for 1 h before adding TADA into  
90 the medium, then imaged the pattern of PG growth after 1 h of incubation in the  
91 presence of TADA. To determine the enzymatic systems for PG growth during  
92 germination, we added the inhibitors of different PBPs together with TADA. The sample

93 was then washed four times and resuspended with TPM buffer (10 mM Tris-HCl pH 7.6,  
94 1 mM  $\text{KH}_2\text{PO}_4$ , 8 mM  $\text{MgSO}_4$ ) before being transferred to a 0.8% agarose pad of ~0.5  
95 mm thickness, which was prepared by heat-dissolving agarose in 10 mM MOPS pH 7.6.  
96 Imaging was completed within 30 min. To quantify the incorporation of TADA, we  
97 defined the ends of spores on the longest axis as  $0^\circ$  and  $180^\circ$  and measured the  
98 fluorescence intensity of TADA in a circular region of 480-nm (3 pixels) diameter every  
99  $45^\circ$  around the spore envelope (Fig. 1E).

### 100 **Fluorescence microscopy and data analysis**

101 Fluorescence and PALM images were captured using a Hamamatsu ImagEM X2™ EM-  
102 CCD camera C9100-23B on an inverted Nikon Eclipse-Ti™ microscope with a 100×  
103 1.49 NA TIRF objective. For all the imaging experiments, 5  $\mu\text{l}$  of spores/cells at different  
104 germination time points were spotted on an agarose pad. For the treatments with  
105 inhibitors, inhibitors were added into both the spore/cell suspension and agarose pads.

106 YFP mCherry and TADA were activated by 488-nm, 561-nm and 532-nm lasers  
107 ( $0.2 \text{ kW}/\text{cm}^2$ ), respectively. The incorporation of TADA into PG was quantified by  
108 ImageJ. For each spore or emerging cell, the highest fluorescence intensity of TADA  
109 was normalized as 20 and the average fluorescence intensities were calculated from 20  
110 spores/cells.

111 MglB and RodA clusters were localized using an algorithm written in MATLAB (11),  
112 which is available upon request. The MglB and RodA clusters that remained in focus for  
113 4-12 frames (60 - 220 s) were subjected to analysis. Among these clusters, the ones  
114 that explored areas smaller than  $160 \text{ nm} \times 160 \text{ nm}$  in a time period of 220 s were  
115 considered as stationary. The diffusive clusters were fit by a symmetric 2D Gaussian

116 function, whose center was assumed to be the cluster's position (12). Their diffusion  
117 coefficient ( $D$ ) was determined from a linear fit to the first four points of the mean  
118 squared displacement (MSD) using formula  $MSD = y^0 + 4D\Delta t$  (13). MreB-PAmCherry  
119 was activated using a 405-nm laser (0.3 - 3 W/cm<sup>2</sup>, 1s) and imaged using a 561-nm  
120 laser (0.2 kW/cm<sup>2</sup>, 0.1 s) under near total internal reflection illumination (14).

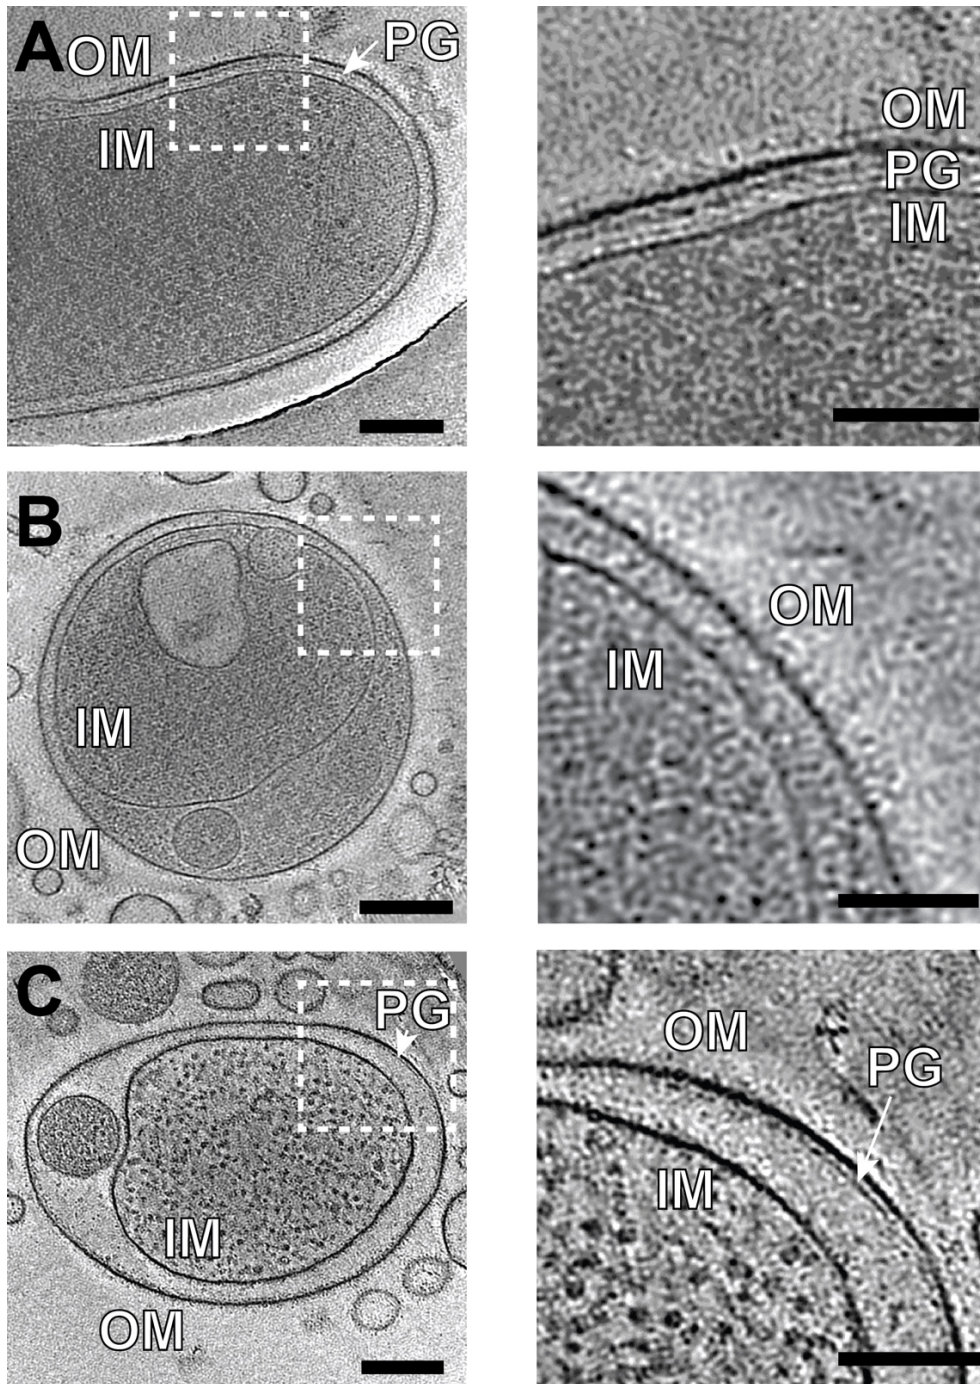

122

123 **Fig. S1. Mature *M. xanthus* spores do not retain intact PG layers that are sufficient**  
 124 **to support cell shape.** Representative slices of 3D tomogram reconstructions of wild-  
 125 type vegetative cells (A) and spores (B, C) are shown. While PG is clearly visible in



126 vegetative cells (A), it is absent in glycerol-induced spores (B). C) Among 15 spores  
 127 imaged, only one shows discontinuous densities that could represent PG fragments.  
 128 Consistent with a pioneer study (15), vesicle-like structures were often observed  
 129 between membranes, which could result from the excess membranes when rod-shaped  
 130 cells convert to spherical spores (B, C). For each panel on the left (scale bars, 200 nm),  
 131 a zoom-in view of the tomogram slice in a white dash box is shown on the right (scale  
 132 bars, 50 nm).

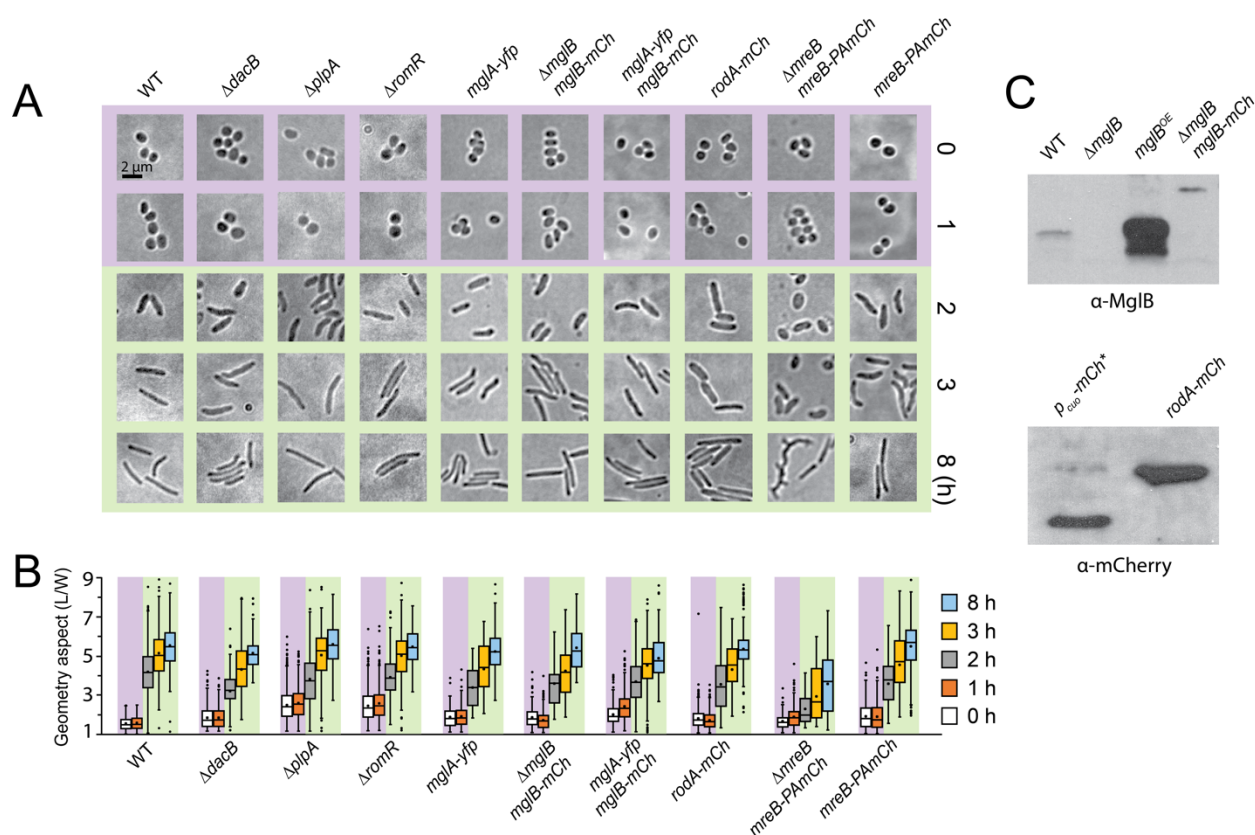

133  
 134 **Fig. S2. The germination of spores of various genetic backgrounds. A)**  
 135 Morphological changes at different time points during germination. **B)** Quantitative  
 136 analysis of the germination progress using the aspect ratios (L/W) of spores/cells.  
 137 Boxes indicate the 25<sup>th</sup> - 75<sup>th</sup> percentiles, whiskers the 5<sup>th</sup> - 95<sup>th</sup> percentiles. In each box,  
 138 the midline indicates the median and × indicates the mean (Table S1). Outlier data



139 points are shown as individual dots above and below the whiskers. **C)** MglB-mCherry  
 140 and RodA-mCherry are stably expressed in *M. xanthus* cells. \*, leak expression.

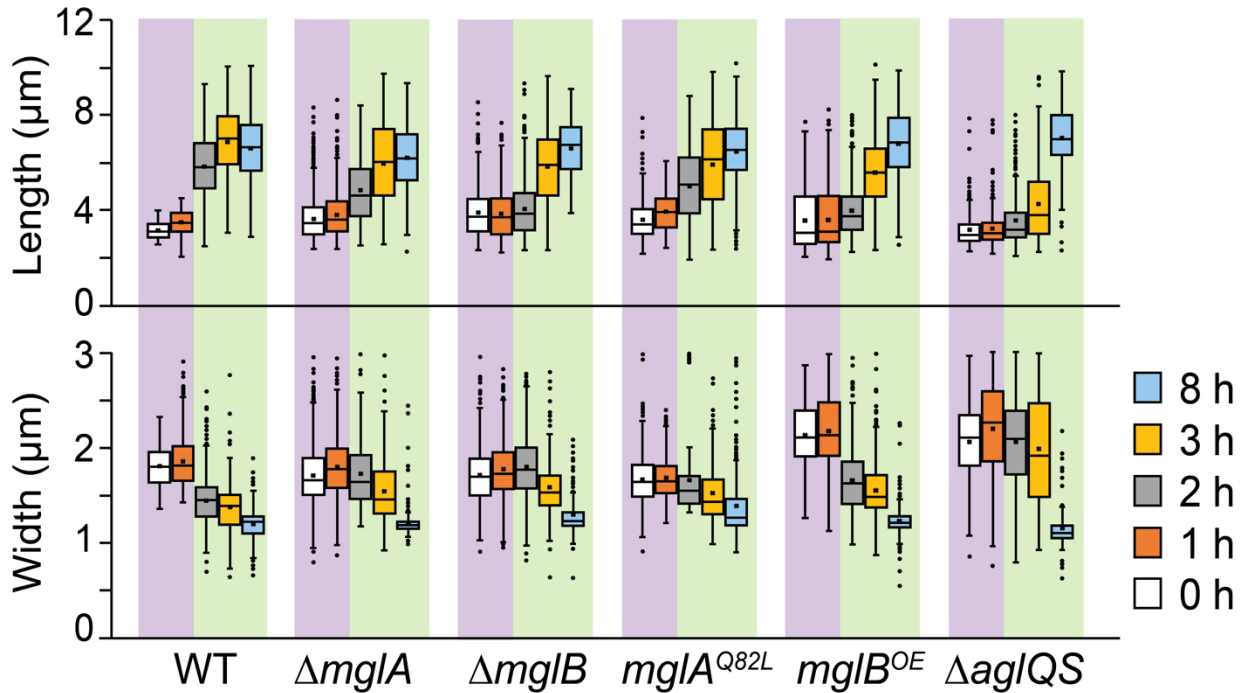

141  
 142 **Fig. S3. The changes of length and width during spore germination.** While the  
 143 length and width of spores both increased slightly (by 6.91% and 2.74%, respectively) in  
 144 Phase I of germination, maintaining the geometry aspect unchanged, when germination  
 145 progressed to Phase II, emerging cells continued to grow in length but shrink in width.  
 146

147 **MOVIE CAPTIONS**

148 **Movie S1. The sphere-to-rod morphological transition during the germination of**  
149 **wild-type *M. xanthus* spores.** Images were taken at 4-min intervals and the movie  
150 plays at 10 Hz (2,400 × speedup).

151 **Movie S2. Oval spores do not preserve polarity from previous vegetative cells.** An  
152 oval spore elongates into rod shape along its short axis. Images were taken at 4-min  
153 intervals and the movie plays at 10 Hz (2,400 × speedup). Also see [Fig. 1C](#).

154 **Movie S3. The  $\Delta$ *mgIA* spores generate pronounced bulges at nonpolar regions,**  
155 **appearing to have multiple cell poles.** Images were taken at 4-min intervals and the  
156 movie plays at 10 Hz (2,400 × speedup). Also see [Fig. 2C](#).

157 **Movie S4. The diffusive dynamics of MglB-mCherry clusters in Phase I of**  
158 **germination.** Images were taken at 20-s intervals and the movie plays at 10 Hz (200 ×  
159 speedup). Also see [Fig. 3C](#).

160 **Movie S5. MglB-mCherry clusters stabilized at future cell poles during**  
161 **germination.** MglB-mCherry clusters first move randomly in spores then stabilize at  
162 future poles. Once MglB clusters stabilize, emerging cells start to elongate into rods.  
163 Images were taken at 5-min intervals and the movie plays at 5 Hz (1,500 × speedup).  
164 Also see [Fig. 3D](#).

165 **Movie S6. MglB-mCherry clusters oscillate between cell poles in Phase II of**  
166 **germination.** Instead of diffusing, these MglB-mCherry clusters oscillate between cell  
167 poles. Images were taken at 20-s intervals and the movie plays at 10 Hz (200 ×  
168 speedup). Also see [Fig. 3C](#).

169 **Movie S7. The diffusion of RodA-mCherry clusters in untreated vegetative cells.**  
170 The diffusion of RodA-mCherry clusters Images were taken at 300-ms intervals and the  
171 movie plays at 10 Hz (3 × speedup).

172 **Movie S8. The diffusion of RodA-mCherry clusters in mecillinam-treated**  
173 **vegetative cells.** The diffusion of RodA-mCherry clusters Images were taken at 300-ms  
174 intervals and the movie plays at 10 Hz (3 × speedup).

**Table S1.** Quantification (mean ± SD) of germination progress of *M. xanthus* spores using their length (L, μm), width (W, μm), and length to width ratios (L/W) at different time points of germination.

|                              |                        | <b>Germination time (h)</b>                                                        |                                                                       |                                                                       |                                                                      |                                                                      |  |
|------------------------------|------------------------|------------------------------------------------------------------------------------|-----------------------------------------------------------------------|-----------------------------------------------------------------------|----------------------------------------------------------------------|----------------------------------------------------------------------|--|
| <b>Strain</b>                | <b>Treatment</b>       | <b>0</b>                                                                           | <b>1</b>                                                              | <b>2</b>                                                              | <b>3</b>                                                             | <b>8</b>                                                             |  |
| Wild-type                    | Untreated              | L/W = 1.56 ± 0.36<br>L = 3.33 ± 0.54<br>W = 1.82 ± 0.22<br>(n = 789 <sup>a</sup> ) | L/W = 1.55 ± 0.33<br>L = 3.56 ± 0.57<br>W = 1.87 ± 0.27<br>(n = 759)  | L/W = 4.19 ± 1.21<br>L = 5.86 ± 1.32<br>W = 1.44 ± 0.27<br>(n = 412)  | L/W = 5.16 ± 1.32<br>L = 6.88 ± 1.43<br>W = 1.38 ± 0.28<br>(n = 197) | L/W = 5.57 ± 1.08<br>L = 6.61 ± 1.41<br>W = 1.20 ± 0.18<br>(n = 232) |  |
|                              | Mecillinam (100 μg/ml) |                                                                                    | L/W = 1.48 ± 0.26<br>(n = 269)                                        | L/W = 1.42 ± 0.28<br>(n = 261)                                        | L/W = 1.45 ± 0.41<br>(n = 427)                                       | L/W = 1.67 ± 0.47<br>(n = 213)                                       |  |
|                              | A22 (10 μg/ml)         |                                                                                    | L/W = 1.45 ± 0.37<br>(n = 696)                                        | L/W = 1.57 ± 0.42<br>(n = 401)                                        | L/W = 1.60 ± 0.45<br>(n = 443)                                       | L/W = 1.50 ± 0.42<br>(n = 903)                                       |  |
|                              | Cefsulodin (5 mg/ml)   |                                                                                    | L/W = 1.57 ± 0.43<br>(n = 319)                                        | L/W = 2.18 ± 0.68<br>(n = 221)                                        | L/W = 2.95 ± 0.89<br>(n = 265)                                       | L/W = 1.96 ± 0.99<br>(n = 339)                                       |  |
|                              | Cefmetazole (5 mg/ml)  |                                                                                    | L/W = 1.75 ± 0.57<br>(n = 141)                                        | L/W = 2.08 ± 0.73<br>(n = 233)                                        | L/W = 2.72 ± 1.18<br>(n = 562)                                       | L/W = 1.19 ± 0.38<br>(n = 308)                                       |  |
|                              | Fosfomycin (1 mg/ml)   |                                                                                    | L/W = 1.57 ± 0.36<br>(n = 501)                                        | L/W = 3.03 ± 1.00<br>(n = 446)                                        | L/W = 3.86 ± 1.13<br>(n = 235)                                       | L/W = 4.19 ± 1.21<br>(n = 252)                                       |  |
| <i>mreB</i> <sup>V323A</sup> | A22 (10 μg/ml)         | L/W = 2.40 ± 0.73<br>(n = 450)                                                     | L/W = 2.41 ± 0.78<br>(n = 576)                                        | L/W = 2.97 ± 0.95<br>(n = 539)                                        | L/W = 3.81 ± 1.08<br>(n = 608)                                       | L/W = 4.70 ± 1.26<br>(n = 479)                                       |  |
| <i>ΔmglA</i>                 | Untreated              | L/W = 2.19 ± 0.69<br>L = 3.62 ± 0.86<br>W = 1.71 ± 0.29<br>(n = 2033)              | L/W = 2.19 ± 0.73<br>L = 3.79 ± 0.92<br>W = 1.80 ± 0.31<br>(n = 1224) | L/W = 2.65 ± 1.05<br>L = 4.82 ± 1.34<br>W = 1.71 ± 0.33<br>(n = 471)  | L/W = 4.09 ± 1.47<br>L = 5.93 ± 1.64<br>W = 1.54 ± 0.37<br>(n = 140) | L/W = 5.08 ± 1.02<br>L = 6.17 ± 1.31<br>W = 1.18 ± 0.07<br>(n = 194) |  |
| <i>ΔmglB</i>                 | Untreated              | L/W = 1.97 ± 0.72<br>L = 3.90 ± 0.99<br>W = 1.70 ± 0.29<br>(n = 536)               | L/W = 1.93 ± 0.77<br>L = 3.87 ± 1.00<br>W = 1.78 ± 0.32<br>(n = 511)  | L/W = 2.02 ± 0.89<br>L = 4.06 ± 1.12<br>W = 1.80 ± 0.33<br>(n = 1181) | L/W = 3.84 ± 1.39<br>L = 5.82 ± 1.64<br>W = 1.59 ± 0.29<br>(n = 297) | L/W = 5.18 ± 1.01<br>L = 6.61 ± 1.16<br>W = 1.29 ± 0.21<br>(n = 161) |  |
| <i>mglA</i> <sup>Q82L</sup>  | Untreated              | L/W = 2.25 ± 0.68<br>L = 3.60 ± 0.82<br>W = 1.67 ± 0.27<br>(n = 383)               | L/W = 2.27 ± 0.49<br>L = 3.95 ± 0.82<br>W = 1.68 ± 0.22<br>(n = 250)  | L/W = 2.59 ± 0.92<br>L = 5.02 ± 1.53<br>W = 1.57 ± 0.22<br>(n = 212)  | L/W = 4.10 ± 1.55<br>L = 5.94 ± 1.89<br>W = 1.52 ± 0.32<br>(n = 142) | L/W = 4.87 ± 1.32<br>L = 6.46 ± 1.37<br>W = 1.39 ± 0.34<br>(n = 273) |  |
| <i>mglB</i> <sup>OE</sup>    | Untreated              | L/W = 1.43 ± 0.37<br>L = 3.79 ± 1.25<br>W = 2.12 ± 0.33<br>(n = 352)               | L/W = 1.53 ± 0.47<br>L = 3.81 ± 1.20<br>W = 2.16 ± 0.37<br>(n = 488)  | L/W = 2.56 ± 0.82<br>L = 4.18 ± 1.53<br>W = 1.64 ± 0.33<br>(n = 572)  | L/W = 3.82 ± 1.11<br>L = 5.72 ± 1.32<br>W = 1.54 ± 0.30<br>(n = 399) | L/W = 5.67 ± 1.18<br>L = 6.88 ± 1.52<br>W = 1.22 ± 0.19<br>(n = 202) |  |
| <i>ΔaglQS</i>                | Untreated              | L/W = 1.43 ± 0.45<br>L = 3.16 ± 0.76<br>W = 2.10 ± 0.38<br>(n = 259)               | L/W = 1.38 ± 0.53<br>L = 3.21 ± 0.80<br>W = 2.23 ± 0.46<br>(n = 289)  | L/W = 1.84 ± 1.03<br>L = 3.56 ± 1.14<br>W = 2.10 ± 0.45<br>(n = 264)  | L/W = 2.35 ± 1.38<br>L = 4.25 ± 1.55<br>W = 2.03 ± 0.54<br>(n = 527) | L/W = 5.69 ± 1.24<br>L = 6.18 ± 1.20<br>W = 1.24 ± 0.21<br>(n = 131) |  |
| <i>ΔplpA</i>                 | Untreated              | L/W = 2.29 ± 0.76<br>(n = 761)                                                     | L/W = 2.39 ± 0.75<br>(n = 784)                                        | L/W = 3.56 ± 1.18<br>(n = 321)                                        | L/W = 4.74 ± 1.37<br>(n = 124)                                       | L/W = 5.27 ± 1.00<br>(n = 158)                                       |  |
| <i>ΔromR</i>                 | Untreated              | L/W = 2.33 ± 0.79<br>(n = 1238)                                                    | L/W = 2.46 ± 0.87<br>(n = 580)                                        | L/W = 4.98 ± 1.64<br>(n = 216)                                        | L/W = 4.99 ± 1.64<br>(n = 118)                                       | L/W = 5.46 ± 1.03<br>(n = 162)                                       |  |
| <i>ΔdacB</i>                 | Untreated              | L/W = 1.63 ± 0.50<br>(n = 693)                                                     | L/W = 1.62 ± 0.47<br>(n = 390)                                        | L/W = 2.84 ± 0.77<br>(n = 605)                                        | L/W = 3.83 ± 1.27<br>(n = 350)                                       | L/W = 4.57 ± 0.66<br>(n = 181)                                       |  |
| <i>mglA-yfp</i>              | Untreated              | L/W = 1.79 ± 0.53<br>(n = 149)                                                     | L/W = 1.83 ± 0.55<br>(n = 271)                                        | L/W = 3.36 ± 1.03<br>(n = 434)                                        | L/W = 4.33 ± 1.25<br>(n = 577)                                       | L/W = 5.25 ± 1.09<br>(n = 392)                                       |  |
| <i>ΔmglB mglB-mCh</i>        | Untreated              | L/W = 1.99 ± 0.59<br>(n = 192)                                                     | L/W = 1.71 ± 0.50<br>(n = 575)                                        | L/W = 3.83 ± 1.31<br>(n = 572)                                        | L/W = 4.56 ± 1.60<br>(n = 614)                                       | L/W = 5.89 ± 1.29<br>(n = 377)                                       |  |
| <i>mglA-yfp mglB-mCh</i>     | Untreated              | L/W = 1.90 ± 0.53<br>(n = 348)                                                     | L/W = 2.31 ± 0.69<br>(n = 526)                                        | L/W = 3.56 ± 1.12<br>(n = 501)                                        | L/W = 4.39 ± 1.31<br>(n = 341)                                       | L/W = 4.76 ± 1.05<br>(n = 472)                                       |  |
| <i>rodA-mCh</i>              | Untreated              | L/W = 1.75 ± 0.53<br>(n = 477)                                                     | L/W = 1.66 ± 0.43<br>(n = 556)                                        | L/W = 3.50 ± 1.31<br>(n = 467)                                        | L/W = 4.25 ± 1.19<br>(n = 509)                                       | L/W = 5.31 ± 1.16<br>(n = 423)                                       |  |
| <i>ΔmreB mreB-PAmCh</i>      | Untreated              | L/W = 1.64 ± 0.43<br>(n = 131)                                                     | L/W = 1.87 ± 0.57<br>(n = 257)                                        | L/W = 2.30 ± 0.86<br>(n = 564)                                        | L/W = 2.96 ± 1.22<br>(n = 865)                                       | L/W = 3.65 ± 1.75<br>(n = 566)                                       |  |
| <i>mreB-PAmCh</i>            | Untreated              | L/W = 1.89 ± 0.67<br>(n = 252)                                                     | L/W = 1.89 ± 0.71<br>(n = 484)                                        | L/W = 3.59 ± 1.16<br>(n = 281)                                        | L/W = 4.56 ± 1.42<br>(n = 362)                                       | L/W = 5.51 ± 1.38<br>(n = 274)                                       |  |

**Table S2. Strains, primers and plasmids**

| Bacterial Strains                                                                             | Source           | Identifier |
|-----------------------------------------------------------------------------------------------|------------------|------------|
| DZ2 (wild-type <i>M. xanthus</i> strain)                                                      | Laboratory stock | N/A        |
| <i>pilA::tet</i>                                                                              | (16)             | DZ4469     |
| <i>mreB</i> <sup>V323A</sup>                                                                  | (17)             | TM264      |
| $\Delta$ <i>mgIA</i>                                                                          | (2)              | TM12       |
| $\Delta$ <i>mgIA pilA::tet</i>                                                                | (18)             | BN220      |
| $\Delta$ <i>mgIB</i>                                                                          | (2)              | TM155      |
| $\Delta$ <i>mgIB pilA::tet</i>                                                                | (18)             | BN221      |
| $\Delta$ <i>mgIA p</i> <sub>mgIA</sub> - <i>mgIA</i> <sup>Q82L</sup>                          | (2)              | TM239      |
| $\Delta$ <i>pIpA</i>                                                                          | (18)             | BN201      |
| $\Delta$ <i>romR</i>                                                                          | (19)             | TM254      |
| $\Delta$ <i>aglQS</i>                                                                         | (18)             | BN121      |
| $\Delta$ <i>aglQS pilA::tet</i>                                                               | This study       | BN285      |
| $\Delta$ <i>dacB</i>                                                                          | This study       | TM1142     |
| $\Delta$ <i>mgIA \Delta</i> <i>dacB</i>                                                       | This study       | BN286      |
| $\Delta$ <i>mgIB \Delta</i> <i>dacB</i>                                                       | This study       | BN287      |
| $\Delta$ <i>aglQS \Delta</i> <i>dacB</i>                                                      | This study       | BN288      |
| <i>mgIA-yfp</i>                                                                               | (2)              | TM17       |
| $\Delta$ <i>mgIB mgIA-yfp</i>                                                                 | (2)              | TM192      |
| $\Delta$ <i>mgIB p</i> <sub>mgIB</sub> - <i>mgIB-mCherry</i>                                  | This study       | BN289      |
| <i>mgIA-yfp mgIB-mCherry</i>                                                                  | This study       | BN290      |
| $\Delta$ <i>mreB p</i> <sub>mreB</sub> - <i>mreB-PAmCherry</i>                                | (11)             | BN291      |
| <i>p</i> <sub>mreB</sub> - <i>mreB-PAmCherry</i>                                              | This study       | BN292      |
| $\Delta$ <i>mgIA p</i> <sub>mreB</sub> - <i>mreB-PAmCherry</i>                                | This study       | BN293      |
| $\Delta$ <i>mgIB p</i> <sub>mreB</sub> - <i>mreB-PAmCherry</i>                                | This study       | BN294      |
| $\Delta$ <i>aglQS p</i> <sub>mreB</sub> - <i>mreB-PAmCherry</i>                               | This study       | BN295      |
| <i>rodA-mCherry::kan</i>                                                                      | This study       | BN296      |
| <i>p</i> <sub>cuo</sub> - <i>mCherry</i>                                                      | This study       | BN297      |
| $\Delta$ <i>mgIA rodA-mCherry::kan</i>                                                        | This study       | BN298      |
| $\Delta$ <i>mgIB rodA-mCherry::kan</i>                                                        | This study       | BN299      |
| $\Delta$ <i>aglQS rodA-mCherry::kan</i>                                                       | This study       | BN300      |
| Primers for the construction of pBN <sub><i>dacB</i></sub>                                    |                  |            |
| CGGAATTCAGGTCCATGCCAATCAGCTC                                                                  | This study       | N/A        |
| GGGTACCGACTGGCCGCCTGGAAAGG                                                                    | This study       | N/A        |
| CGGGATCCAGGACGCACCGTCTCATTC                                                                   | This study       | N/A        |
| GCTCTAGAGGCCACGTCATAGACGGTG                                                                   | This study       | N/A        |
| Primers for labeling RodA with mCherry                                                        |                  |            |
| AAGCTTCGAGCGCGACCACGCCTGGTA                                                                   | This study       | N/A        |
| GGATCCGAACATGTGACGGCGCATGCTGA                                                                 | This study       | N/A        |
| Plasmids                                                                                      |                  |            |
| pBJ113                                                                                        | (1)              | pBJ113     |
| pCK126 (pSWU30 <i>mgIB-mCherry</i> )                                                          | (20)             | N/A        |
| pBN- <i>mCherry</i>                                                                           | (21)             | N/A        |
| pBN <sub><i>mreB</i></sub> (pSWU30- <i>P</i> <sub><i>mreB</i></sub> - <i>mreB-PAmCherry</i> ) | (11)             | N/A        |
| pBN <sub><i>dacB</i></sub> (plasmid for <i>dacB</i> deletion)                                 | This study       | N/A        |
| pBN- <i>rodA-mCherry</i>                                                                      | This study       | N/A        |

181 **References**

- 182 1. B. Julien, A. D. Kaiser, A. Garza, Spatial control of cell differentiation in  
183 *Myxococcus xanthus*. *Proceedings of the National Academy of Sciences of the*  
184 *United States of America* **97**, 9098-9103 (2000).
- 185 2. Y. Zhang, M. Franco, A. Ducret, T. Mignot, A bacterial Ras-like small GTP-  
186 binding protein and its cognate GAP establish a dynamic spatial polarity axis to  
187 control directed motility. *PLoS Biol* **8**, e1000430 (2010).
- 188 3. M. Wartel *et al.*, A versatile class of cell surface directional motors gives rise to  
189 gliding motility and sporulation in *Myxococcus xanthus*. *PLoS Biol* **11**, e1001728  
190 (2013).
- 191 4. S. Zhu, Z. Qin, J. Wang, D. R. Morado, J. Liu, In Situ Structural Analysis of the  
192 Spirochetal Flagellar Motor by Cryo-Electron Tomography. *Methods Mol Biol*  
193 **1593**, 229-242 (2017).
- 194 5. D. N. Mastronarde, Automated electron microscope tomography using robust  
195 prediction of specimen movements. *Journal of Structural Biology* **152**, 36-51  
196 (2005).
- 197 6. X. M. Li *et al.*, Electron counting and beam-induced motion correction enable  
198 near-atomic-resolution single-particle cryo-EM. *Nature Methods* **10**, 584-+  
199 (2013).
- 200 7. D. R. Morado, B. Hu, J. Liu, Using Tomoauto: A Protocol for High-throughput  
201 Automated Cryo-electron Tomography. *Jove-J Vis Exp* ARTN e53608  
202 10.3791/53608 (2016).
- 203 8. Q. R. Xiong, M. K. Morphew, C. L. Schwartz, A. H. Hoenger, D. N. Mastronarde,  
204 CTF determination and correction for low dose tomographic tilt series. *Journal of*  
205 *Structural Biology* **168**, 378-387 (2009).
- 206 9. J. I. Agulleiro, J. J. Fernandez, Tomo3D 2.0-Exploitation of Advanced Vector  
207 eXtensions (AVX) for 3D reconstruction. *Journal of Structural Biology* **189**, 147-  
208 152 (2015).
- 209 10. J. R. Kremer, D. N. Mastronarde, J. R. McIntosh, Computer visualization of three-  
210 dimensional image data using IMOD. *Journal of Structural Biology* **116**, 71-76  
211 (1996).
- 212 11. G. Fu *et al.*, MotAB-like machinery drives the movement of MreB filaments during  
213 bacterial gliding motility. *Proc Natl Acad Sci U S A* **115**, 2484-2489 (2018).
- 214 12. E. Betzig *et al.*, Imaging intracellular fluorescent proteins at nanometer  
215 resolution. *Science* **313**, 1642-1645 (2006).
- 216 13. T. K. Lee, K. Meng, H. Shi, K. C. Huang, Single-molecule imaging reveals  
217 modulation of cell wall synthesis dynamics in live bacterial cells. *Nature*  
218 *communications* **7**, 13170 (2016).
- 219 14. B. Nan *et al.*, Flagella stator homologs function as motors for myxobacterial  
220 gliding motility by moving in helical trajectories. *Proc Natl Acad Sci U S A* **110**,  
221 E1508-1513 (2013).
- 222 15. K. Bacon, F. A. Eiserling, A unique structure in microcysts of *Myxococcus*  
223 *xanthus*. *J Ultrastruct Res* **21**, 378-382 (1967).
- 224 16. H. C. Vlamakis, J. R. Kirby, D. R. Zusman, The Che4 pathway of *Myxococcus*  
225 *xanthus* regulates type IV pilus-mediated motility. *Mol Microbiol* **52**, 1799-1811  
226 (2004).

- 227 17. E. M. Mauriello *et al.*, Bacterial motility complexes require the actin-like protein,  
228 MreB and the Ras homologue, MglA. *Embo J* **29**, 315-326 (2010).
- 229 18. C. B. Pogue, T. Zhou, B. Nan, PlpA, a PilZ-like protein, regulates directed motility  
230 of the bacterium *Myxococcus xanthus*. *Mol Microbiol* **107**, 214-228 (2018).
- 231 19. Y. Zhang, M. Guzzo, A. Ducret, Y. Z. Li, T. Mignot, A dynamic response regulator  
232 protein modulates G-protein-dependent polarity in the bacterium *Myxococcus*  
233 *xanthus*. *PLoS Genet* **8**, e1002872 (2012).
- 234 20. C. Kaimer, D. R. Zusman, Phosphorylation-dependent localization of the  
235 response regulator FrzZ signals cell reversals in *Myxococcus xanthus*. *Mol*  
236 *Microbiol* **88**, 740-753 (2013).
- 237 21. B. Nan, E. M. Mauriello, I. H. Sun, A. Wong, D. R. Zusman, A multi-protein  
238 complex from *Myxococcus xanthus* required for bacterial gliding motility. *Mol*  
239 *Microbiol* **76**, 1539-1554 (2010).
- 240
